1 Circadian programming of the ellipsoid body sleep homeostat in *Drosophila*

2

3

4 Tomas Andreani<sup>1</sup>, Clark Rosensweig<sup>1</sup>, Shiju Sisobhan<sup>1</sup>, Emmanuel Ogunlana<sup>1</sup>, William Kath<sup>2</sup>,  
5 and Ravi Allada<sup>1,3,\*</sup>

6 <sup>1</sup>Department of Neurobiology, Northwestern University, Evanston, IL, 60208 USA

7 <sup>2</sup>Department of Engineering Sciences and Applied Mathematics, Northwestern University,  
8 Evanston, Illinois 60208

9 <sup>3</sup>Lead Contact

10 \*Correspondence: [r-allada@northwestern.edu](mailto:r-allada@northwestern.edu)

11

12

13

14

15

16

17

18

19

20

21

22

23

24 **Summary**

25 Homeostatic and circadian processes collaborate to appropriately time and consolidate sleep and  
26 wake. To understand how these processes are integrated, we scheduled brief sleep deprivation at  
27 different times of day in *Drosophila* and find elevated morning rebound compared to evening.  
28 These effects depend on discrete morning and evening clock neurons, independent of their roles  
29 in circadian locomotor activity. In the R5 ellipsoid body sleep homeostat, we identified elevated  
30 morning expression of activity dependent and presynaptic gene expression as well as the  
31 presynaptic protein BRUCHPILOT consistent with regulation by clock circuits. These neurons  
32 also display elevated calcium levels in response to sleep loss in the morning, but not the evening  
33 consistent with the observed time-dependent sleep rebound. These studies reveal the circuit and  
34 molecular mechanisms by which discrete circadian clock neurons program a homeostatic sleep  
35 center.

## 36 **Introduction**

37 The classic two process model posits that the circadian clock and the sleep homeostat  
38 independently regulate sleep (Borbely, 1982; Borbely et al., 2016). The circadian process, via  
39 phased activity changes in central pacemaker neurons, times and consolidates sleep-wake (Patke  
40 et al., 2020). The less well understood homeostatic process, often assayed after extended sleep  
41 deprivation, promotes sleep length, depth, and amount as a function of the duration and intensity  
42 of prior waking experience (Deboer & Tobler, 2000; Franken et al., 1991; Huber et al., 2004;  
43 Werth et al., 1996). Sleep homeostasis is thought to be mediated by the accumulation of various  
44 wake-dependent factors, such as synaptic strength (Tononi & Cirelli, 2014), which are  
45 subsequently dissipated with sleep.

46 While homeostatic drive persists in the absence of a functioning circadian clock (Tobler et  
47 al., 1983), homeostatic drive can be modulated by the circadian clock. Abolishing clock output  
48 through mutation of most core clock genes (Franken et al., 2006; Laposky et al., 2005; Wisor et  
49 al., 2002) or electrolytic ablation of the mammalian circadian pacemaker, the suprachiasmatic  
50 nuclei (SCN) (Easton et al., 2004) reduces SD-induced changes in non-rapid eye movement  
51 (NREM) sleep, an indicator of homeostatic sleep drive in mammals. As circadian clock genes  
52 and even the SCN may regulate processes that are not themselves rhythmic (F. Fernandez et al.,  
53 2014; McDonald & Rosbash, 2001), these studies leave open the question about whether  
54 homeostasis is circadian regulated. To more definitely address the interaction between the clock  
55 and the homeostat, sleep-wake have been scheduled to different circadian times in forced  
56 desynchrony protocols (Dijk & Czeisler, 1994, 1995). In one such protocol, sleep and wake are  
57 scheduled to occur every 28 hours, allowing the circadian clock to free-run with a ~24 h period.  
58 Under these conditions, a variety of indicators of homeostatic drive such as total time asleep,

59 latency to sleep, and NREM sleep time are reduced in the evening independent of time awake  
60 (Dijk & Czeisler, 1994, 1995; Dijk & Duffy, 1999; Lazar et al., 2015), consistent with the idea  
61 that the clock sustains wakefulness at the end of the waking period in the evening. Yet the  
62 molecular and circuit mechanisms by which the circadian clock modulates sleep homeostasis  
63 remain unclear.

64 To understand the mechanistic basis of circadian regulation of sleep homeostasis, we are  
65 using *Drosophila*, a well-established model for investigating the molecular and neural basis of  
66 circadian rhythms and sleep. Sleep in flies is characterized by quiescence, increased arousal  
67 thresholds, changes in neuronal activity, and circadian and homeostatic regulation (Campbell &  
68 Tobler, 1984). Flies display each of these hallmarks (Hendricks et al., 2000; Shaw et al., 2000;  
69 van Alphen et al., 2013) and have simple, well characterized circadian and sleep neural networks  
70 (Dubowy & Sehgal, 2017; Shafer & Keene, 2021). About 150 central pacemaker neurons that  
71 express molecular clocks (Dubowy & Sehgal, 2017). Of these, four small ventral lateral neurons  
72 (sLN<sub>v</sub>s) expressing pigment dispersing factor (PDF) are necessary for driving morning activity  
73 in anticipation of lights on and exhibit peak levels of calcium around dawn (~ZT0) (Grima et al.,  
74 2004; Liang et al., 2019; Liang et al., 2017; Stoleru et al., 2004). The dorsal lateral neurons  
75 (LN<sub>d</sub>s) and a 5th PDF<sup>-</sup> sLN<sub>v</sub> are necessary for evening anticipation of lights off and show a  
76 corresponding evening calcium peak (ZT8-ZT10) (Grima et al., 2004; Guo et al., 2014#22;  
77 Liang et al., 2019; Liang et al., 2017; Stoleru et al., 2004). The posterior DN1 (DN1<sub>ps</sub>) consist of  
78 glutamate-positive (Glu<sup>+</sup>) subsets necessary for morning anticipation and Glu<sup>-</sup> necessary for  
79 evening anticipation under low light conditions (Chatterjee et al., 2018). Lateral posterior  
80 neurons (LPN) are not necessary for anticipation but are uniquely sensitive to temperature  
81 cycling (Miyasako et al., 2007). Specific pacemaker subsets have been linked to wake promotion

82 (PDF<sup>+</sup> large LNv(Chung et al., 2009; Parisky et al., 2008; Sheeba et al., 2008), diuretic hormone  
83 31 (DH31<sup>+</sup>) DN1ps(Kunst et al., 2014)) and sleep promotion (Glu<sup>+</sup> DN1ps (Guo et al., 2016),  
84 Allostatin A<sup>+</sup> LPNs (Ni et al., 2019)), independently of their clock functions. How these neurons  
85 regulate homeostatic sleep drive itself remains unsettled.

86         Timed signaling from these clock neurons converges on the neuropil of the ellipsoid body  
87 (EB). The sLNvs and LNds may communicate to R5 EB neurons possibly through an  
88 intermediate set of dopaminergic PPM3 neurons based largely on correlated calcium  
89 oscillations(Liang et al., 2019). The anterior projecting subset of DN1ps provide sleep promoting  
90 input to other EB neurons (R2/R4M) via tubercular bulbar (TuBu) interneurons (Guo et al.,  
91 2018; Lamaze et al., 2018). Activation of a subset of these TuBu neurons synchronizes the  
92 activity of the R5 neurons which is important for sleep maintenance (Raccuglia et al., 2019).  
93 Critically, the R5 neurons are at the core of sleep homeostasis in *Drosophila* (Liu et al., 2016).  
94 R5 neuronal activity is both necessary and sufficient for sleep rebound(Liu et al., 2016).  
95 Extended sleep deprivation (12-24h) elevates calcium, the critical presynaptic protein  
96 BRUCHPILOT (BRP), and action potential firing rates in R5 neurons. The changes in BRP in  
97 this region not only reflect increased sleep drive following SD but also KD of *brp* in R5  
98 decreases rebound (Huang et al., 2020) suggesting it functions directly in sleep homeostasis. R5  
99 neurons stimulate downstream neurons in the dorsal fan-shaped body (dFB), which are sufficient  
100 to produce sleep (Donlea et al., 2014; Donlea et al., 2011; Liu et al., 2016). Yet how the activity  
101 of key clock neurons are integrated with signals from the R5 homeostat to determine sleep drive  
102 remains unclear.

103         Here we dissect the link between the circadian and homeostatic drives by examining  
104 which clock neural circuits regulate sleep rebound at different times of day in *Drosophila*. Akin

105 to the forced desynchrony protocols, we enforced wakefulness at different times of day and  
106 assessed sleep rebound. We exposed flies to 7 h cycles of sleep deprivation and recovery,  
107 enabling assessment of homeostasis at every hour of the day. We found that rebound is  
108 suppressed in the evening in a *Clk*-dependent manner. We demonstrate that these effects are  
109 mediated by specific Glu<sup>+</sup> DN1p pacemaker neurons in the morning and PDF<sup>-</sup> LN<sub>d</sub>/sLN<sub>v</sub> in the  
110 evening, independent of their effects on locomotor activity. Moreover, homeostatic R5 EB  
111 neurons integrate circadian timing and homeostatic drive; we demonstrate that activity dependent  
112 and presynaptic gene expression, BRP expression, neuronal output, and wake sensitive calcium  
113 levels are all elevated in the morning compared to the evening, providing an underlying  
114 mechanism for clock programming of time-of-day dependent homeostasis.

115

## 116 **Results**

### 117 **Scheduled sleep deprivation demonstrates suppression of rebound in the evening**

118 To confirm and resolve the timing of clock modulation of sleep rebound, we scheduled sleep  
119 deprivation in flies at different times of day and assessed sleep rebound, a protocol we term  
120 scheduled sleep deprivation (SSD). We employed an ultradian 7h cycle over 7 days allowing us  
121 to observe rebound at each hour of the 24 hour day (24 total deprivations) (Fig. 1a,b). SD was  
122 administered for 2.5 hours followed by 4.5 hours of rebound such that flies would be allowed  $\sim\frac{2}{3}$   
123 of the day to sleep, similar to the ratio of sleep observed in a WT female fly without SD. Given  
124 the potential for stress effects of longer deprivation typically used in flies (6-24h) we opted for a  
125 shorter 2.5 h protocol. Indeed, there was no significant difference between total sleep in flies  
126 kept in SSD and those under baseline conditions (Fig. 1d). In addition, sleep rebound does not  
127 increase over the course of the 7 day protocol further suggesting that flies are able to fully

128 recover sleep during the 4.5 h rebound period (Fig. 1e). To test if SSD modulated the circadian  
 129 phase, SSD flies released into constant dark (DD) following the protocol did not exhibit any  
 130 detectable change in phase (Fig. 1c). Together these results demonstrate that the SSD protocol  
 131 allows assessment of rebound at different times of day without altering total sleep or circadian  
 132 phase.

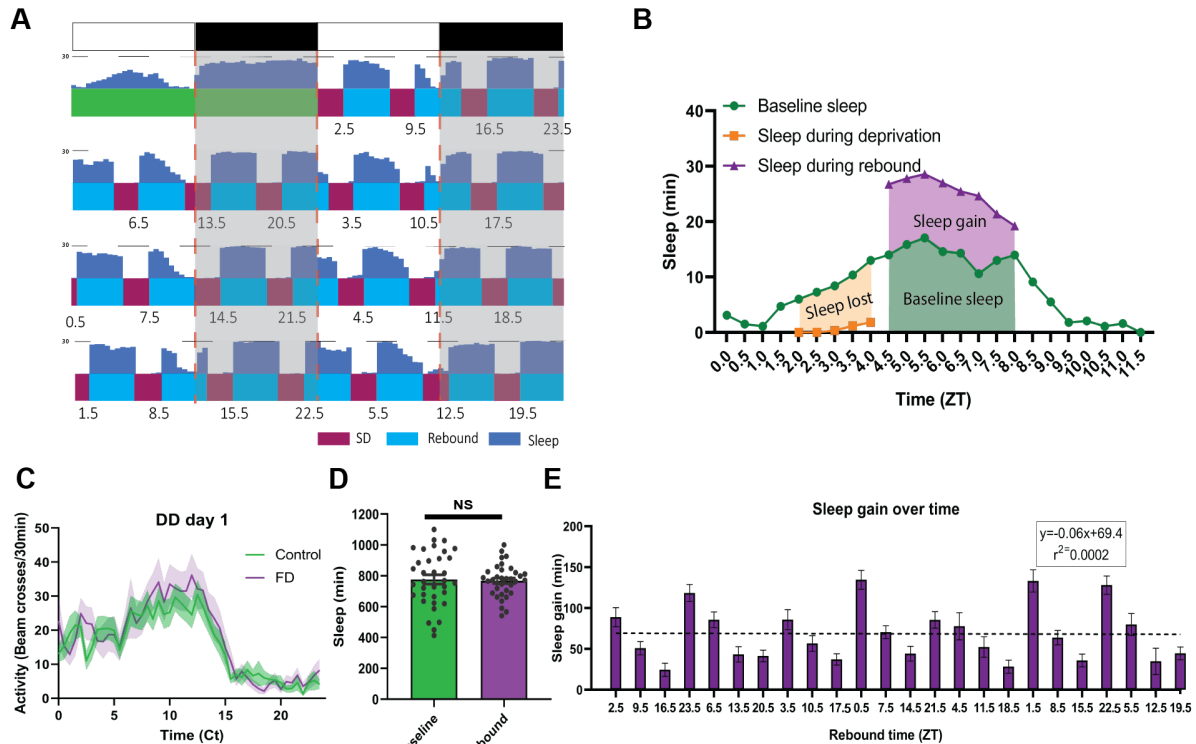

**Figure 1: T7 *Drosophila* forced desynchrony protocol can be used to illustrate time dependent rebound**

(A) Average WT sleep (N=32) over the final 8 days of FD protocol with the time at which rebound begins (ZT) noted below each rebound period. (B) Profiles of sleep metrics used to compare rebound at different times of day (example is rebound occurring at ZT4.5). Sleep lost is determined by the difference between baseline sleep and sleep during the SD. Sleep gain is determined by the difference between rebound and baseline sleep. (C) Average activity of WT flies over 24 hours of flies released into the dark following FD stimulation (N=19) or control (N=19) that received no stimulation. WT Flies released into DD1 following FD display a profile of activity similar to control flies. Shaded bands indicate SEM. (D) Average sleep during baseline and the average sleep per day during the 7 day SD-rebound period (individual flies shown circles). There is no significant difference between average baseline sleep and average sleep per day over the course of the FD ( $P>0.08$ , paired t-test). (E) Average WT (N=32) sleep gain across the course of the experiment with rebound time(ZT) depicted on the x axis. Regression of WT sleep gain over the course of the experiment displays no significant trend ( $P>0.95$  linear regression). Data are means +/- SEM.

133

134 By comparing flies' baseline sleep to their rebound sleep (sleep after deprivation) around

135 the clock, we observed robust rebound in the morning and suppressed rebound in the evening

136 (Fig. 2a). Under baseline conditions, flies typically show morning and evening peaks in

137 wakefulness/activity. After sleep deprivation, flies display a robust sleep rebound throughout the  
138 4.5 h rebound period in the morning while evening rebound is suppressed (Fig. 2a). To  
139 statistically compare morning and evening times of day here and throughout this study, we  
140 selected specific time points where the amount of sleep deprived and the baseline sleep during  
141 the rebound, two potential confounds, were comparable, allowing a direct comparison of sleep  
142 rebound. As indicated in the heat map, we found sleep rebound in the morning is significantly  
143 higher than sleep rebound in the evening when controlling for baseline sleep such that there is a  
144 >2x difference in rebound between morning and evening time points (rebound at ZT1.5~133 min  
145 and ZT9.5~51 min) (Fig. 2c). This was also accompanied by a significant difference in latency  
146 following deprivation (Supplemental Fig. 2c). We observed similar results using a streamlined  
147 protocol focusing on morning (ZT1.5 and 2.5) and evening timepoints (ZT8.5, 9.5, 10.5)  
148 (Supplemental Fig 1). During the course of our experiments, we transitioned to a more  
149 streamlined protocol to reduce the length of the protocol and the number of sleep deprivations,  
150 minimizing the potential for trends in sleep over the course of the protocol. Video evidence  
151 confirms that these morning/evening differences are not due to failure to cross the infrared beam  
152 due to increased feeding (Supplemental Videos 1,2). Lastly, we determined if these effects  
153 persist under constant darkness (DD). We observed elevated rebound in the morning (CT2.5)  
154 relative to the evening (CT10.5), indicating that these differences are not dependent on light (Fig.  
155 2e). All together, this data suggests that homeostatic rebound sleep is strongly modulated by the  
156 internal clock.



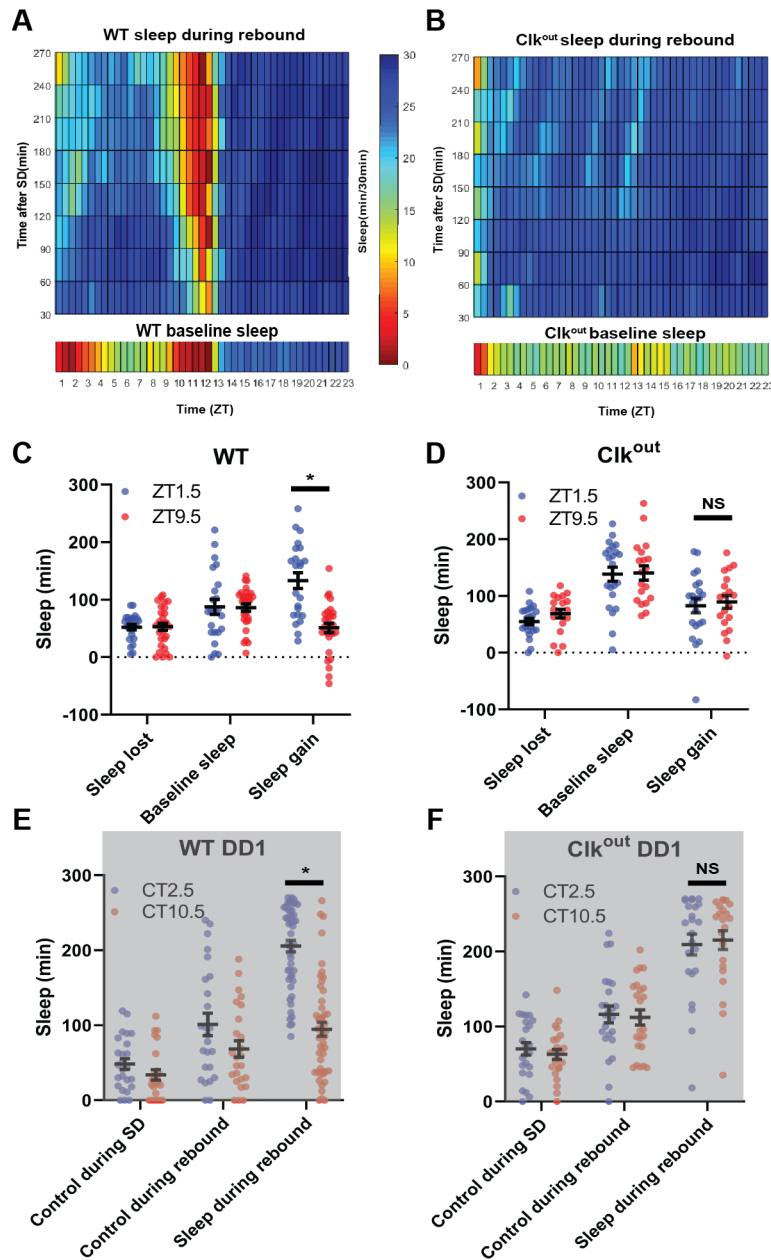

## Figure 2: Sleep rebound is dependent on the molecular clock

(A-B) Rebound sleep heatmaps (above) illustrate average sleep as a function of time of day when rebound occurred (ZT) and minutes after SSD episode. Missing time points are filled using matlab linear interpolation function. Baseline sleep heatmaps (below) illustrate average sleep during 30 min bins. (A) WT (N=32) baseline displays low sleep following lights on and preceding lights off. Immediately following SD flies show high sleep except in the hours preceding lights off. Flies tend to sleep less as rebound time proceeds. (B) *Clk<sup>out</sup>* (N=40) baseline sleep (below) is nearly constant except for low sleep immediately following lights on. SD uniformly increases sleep and flies tend to sleep less as rebound time proceeds. (C-D) Comparison of sleep lost, baseline sleep, and sleep gain following deprivation at morning and evening timepoints in WT and *clk<sup>out</sup>*. (C) Sleep gain is greater for WT (N=32) rebound at ZT1.5 compared to ZT9.5 ( $P < .00001$ , paired t-test). (D) No difference between sleep gain at the two time points is observed in *Clk<sup>out</sup>* (N=40) ( $P > 0.37$ , paired t-test). (E,F) Two sleep measures in control flies (control during SD and control during rebound), along with sleep during rebound in SD with rebound at 2.5 and 10.5. (F) Rebound sleep is greater following deprivation at CT2.5 compared to CT10.5 ( $P < .00001$ , paired t-test) in WT flies (N=49). (G) No difference in rebound sleep is observed in *Clk<sup>out</sup>* (N=23) ( $P > 0.75$ , paired t-test). Data are means  $\pm$  SEM

157

## 158 Sleep rebound is dependent on the molecular clock

159 To determine if morning/evening differences in rebound are due to the circadian clock we  
 160 performed SSD in arrhythmic *Clk<sup>out</sup>* (Lee et al., 2014) and short-period *per<sup>s</sup>* mutants, which have  
 161 an advanced evening peak in LD (Hamblencoye et al., 1992; Konopka & Benzer, 1971). In the  
 162 absence of *Clk*, flies do not display the wild-type morning and evening peaks of wakefulness and

163 exhibit robust rebound at all times, reaching maximal levels of sleep after each SD (Fig. 2b).  
164 Selected morning/evening time points do not exhibit significant differences in rebound in LD  
165 (ZT1.5 and ZT8.5) nor in DD (ZT2.5 and ZT10.5) (Fig. 2d, f). There was also no difference in  
166 latency between matched morning and evening time points (ZT1.5 and ZT8.5) after sleep  
167 deprivation in *Clk<sup>out</sup>* (Supplemental Fig. 2d). Similar to wild-type flies, *per<sup>s</sup>* showed elevated  
168 rebound in the morning compared to the evening; however, as expected, the trough of rebound  
169 sleep in the evening was phase advanced relative to wild-type by about 4 hours (ZT5.5 v. ZT9.5)  
170 (Supplemental Fig. 2a, b). Furthermore, *per<sup>s</sup>* flies exhibit an increased sleep latency following  
171 deprivation in earlier evening time points (ZT7.5) relative to control (ZT9.5) (Supplemental Fig.  
172 2e). The loss of a morning/evening difference in rebound in arrhythmic *Clk<sup>out</sup>* and the phase  
173 advance of evening rebound suppression in *per<sup>s</sup>* further support the role of the clock in regulating  
174 sleep rebound.

175

## 176 **Glutamatergic DN1p circadian pacemaker neurons mediate morning and evening** 177 **differences in rebound**

178 To address the underlying neuronal basis, we employed a “loss-of-function” approach where we  
179 inactivate and/or ablate targeted neuronal populations and assess the impact on sleep rebound at  
180 different times of day. To test the role of clock neurons, we selectively ablated subsets by  
181 expressing the pro-apoptotic gene *head involution defective (hid)* using the Gal4/UAS system.  
182 Ablation of most of the pacemaker neurons including those underlying morning and evening  
183 behavior using *cry39-Gal4* (Klarsfeld et al., 2004; Picot et al., 2007) substantially reduced both  
184 morning and evening anticipation in males (Supplemental Table 1) as previously described  
185 (Grima et al., 2004). Anticipation in females is more difficult to quantify due to more

186 consolidated sleep and wake, i.e., sleep at night reduces morning anticipation, more mid-day  
187 wake reduces evening anticipation(Isaac et al., 2010). Consistent with the loss of circadian  
188 function, ablation also abolished the difference between morning and evening rebound  
189 (Supplemental Fig. 3a, b), predominantly by elevating evening rebound (at ZT9.5 control ~27  
190 min, *cry39-Gal4* ~100 min). We ablated PDF<sup>+</sup> using *pdf-Gal4*, and despite substantially  
191 reduced morning anticipation in males validating our reagent (Supplemental table 1), the  
192 morning/evening difference in rebound nonetheless persists when comparing morning/evening  
193 time points (Supplemental Fig. 3c). Coupling *cry39-Gal4* with *pdf-Gal80* to ablate most clock  
194 cells except PDF<sup>+</sup> neurons confirms this observation; these flies display comparably high  
195 rebound between morning and evening time points similar to *cry39-Gal4* (Supplemental Fig. 3d),  
196 highlighting the role of non-PDF clock neurons.

197         A potential synaptic target of the PDF<sup>+</sup> sLN<sub>v</sub> that are also important for morning  
198 behavior are the Glu<sup>+</sup> DN1p neurons(Chatterjee et al., 2018; L. Zhang et al., 2010; Y. Zhang et  
199 al., 2010). Targeting of the Glu<sup>+</sup> DN1p has relied on drivers that are expressed outside of the  
200 DN1p including other sleep regulatory neurons(Chatterjee et al., 2018; Guo et al., 2016). To  
201 more definitively test their function, we employed the intersectional split Gal4 system (Dionne et  
202 al., 2018) utilizing two promoters, *R18H11* (expressed in DN1p and other neurons)(Guo et al.,  
203 2016) and *R51H05* that uses the vesicular glutamate transporter (vGlut) promoter presumably  
204 targeting glutamatergic neurons. This intersection resulted in expression in just 6-7 neurons per  
205 hemisphere with little or no expression elsewhere in the brain (Fig. 3a, b). We targeted *hid*  
206 expression using this split Gal4, we observed a reduction in morning anticipation in males  
207 demonstrating the necessity of this defined neuronal group (Supplemental Table 1). However, in  
208 females used in our protocols, we did not observe a reduction in morning anticipation, possibly

209 due to the lights-on activity peak masking anticipation (Fig. 3 e, f). We also did not observe  
 210 significant changes in baseline sleep levels (Fig. 3g). Despite the lack of a significant change in  
 211 their baseline sleep/activity profiles, ablation eliminated the difference in morning and evening  
 212 rebound (Fig. 3c, d). This change appears to be primarily due to a reduction of morning rebound  
 213 (at ZT1.5 control ~104 min, Glu<sup>+</sup> DN1p ~59 min). Thus, using highly specific drivers, we find  
 214 that Glu<sup>+</sup> DN1ps promote rebound sleep in the morning largely independent of their role in  
 215 regulating baseline sleep/activity.

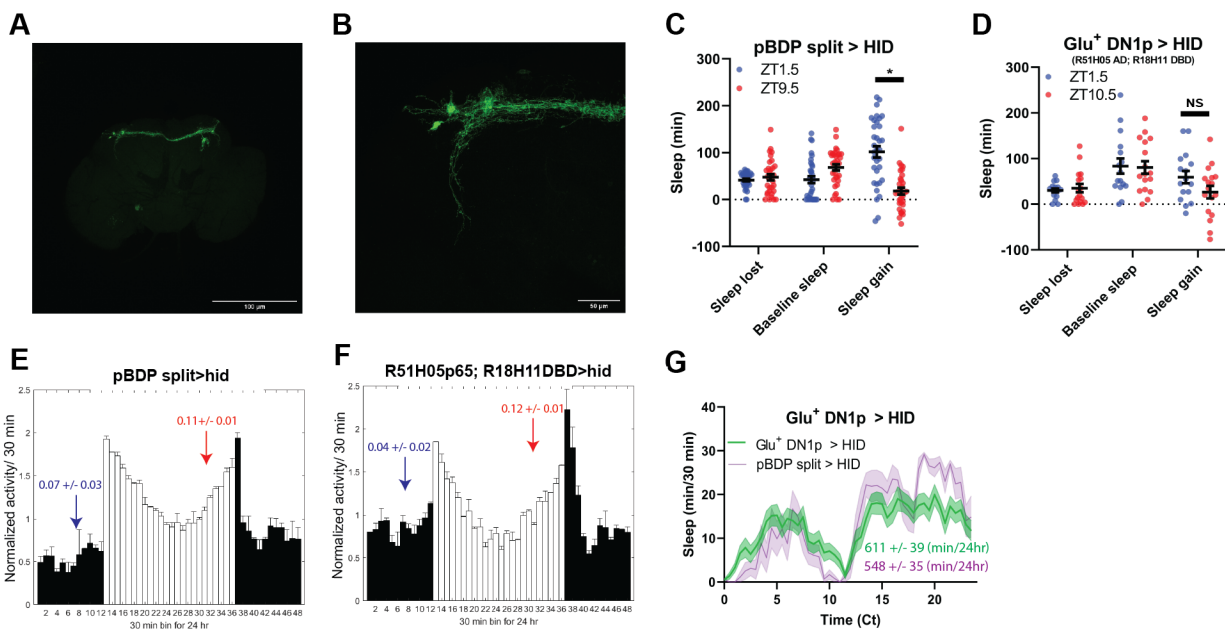

### Figure 3: Glutamatergic DN1ps enhance morning rebound

(A-B) GFP Expression pattern of split Gal4 line that labels Glu<sup>+</sup> Dn1ps (R51H05 AD; R18H11 DBD > GFP) at 10x (A) and 40x (B). (C-D) Comparison of sleep lost, baseline sleep, and sleep gain following deprivation at morning and evening timepoints in glutamatergic DN1p ablated flies. Morning times are matched with evening time points with similar baselines. (C) Control flies with no ablated neurons (pBDP split > hid) (N=26) exhibit greater rebound in the morning compared to matched evening time point (P<0.0001, paired t-test). (D) Flies with Glu<sup>+</sup> DN1ps ablated (R51H05 AD; R18H11 DBD > hid) (N=14) do not exhibit a significant difference in sleep gain between matched morning/evening time points (P>0.09, paired t-test). Data are means ± SEM. (E-F) Averaged activity reductions for female flies during the first 2 days of 12:12 LD. The light-phase is indicated by white bars while the dark-phase is indicated by black bars. Morning and evening anticipation indices are represented in blue and red respectively. (G) Average sleep during the baseline day. Glu<sup>+</sup> DN1ps ablated (R51H05 AD; R18H11 DBD > hid) (N=30) (green) and control (pBDP split > hid) (N=26) (purple). Sleep per 24 hours is indicated in the bottom right. Data are means ± SEM.

216

217 **TuBu and R2/R4m neurons are important for time-dependent modulation of sleep**

218 **homeostasis**

219 A subset of DN1ps send anterior projections to TuBu interneurons which in turn target the  
220 R2/R4m neurons of the EB(Guo et al., 2018; Lamaze et al., 2018)(Fig. 4a). TuBu neurons are a  
221 heterogeneous group distinguished by their axonal projections to 3 regions (superior, anterior  
222 and inferior) of the Bulb (BU), a neuropil comprised of, among other things, dendritic  
223 projections of neurons that form the EB (Lovick et al., 2017; Omoto et al., 2017). Previous  
224 studies have highlighted the role of the superior projecting TuBu neurons in generating sleep  
225 (Guo et al., 2018; Lamaze et al., 2018). To validate and further resolve this circuitry, we mined  
226 the Janelia Farm connectome which uses a large-scale reconstruction of the central brain from  
227 electron microscopy data(Scheffer et al., 2020). Using this approach, we identified direct  
228 synaptic connections from a subset of DN1pB (body IDs: 386834269, 5813071319) to a subset  
229 of TuBu neurons (TuBu01), to R4m neurons and eventually to R2 neurons (Supplemental Fig.  
230 4a,b). Based on their morphology the Tubu01 neurons are anterior\inferior projecting. Thus, this  
231 connectome analysis both validated this circuit but also provided higher resolution for specific  
232 subsets that may be involved.

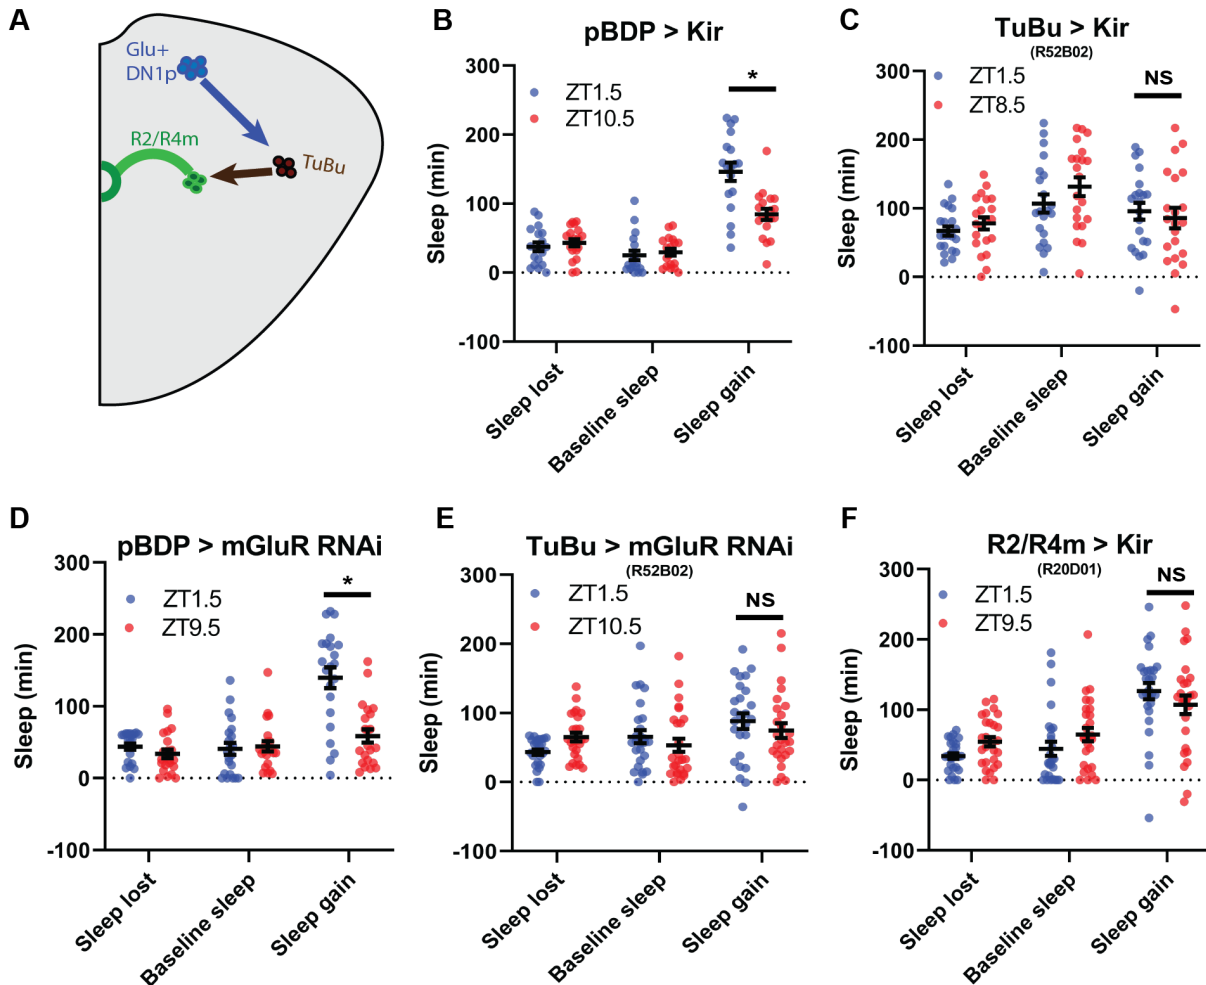

**Figure 4: TuBu intermediates convey enhanced morning glutamatergic signal to R2/R4m ellipsoid body neurons**

(A) Cartoon illustrating proposed link between Glu+ DN1ps and R2/R4m with Tubu intermediates. (B-F) Comparison of sleep lost, baseline sleep, and sleep gain following deprivation at morning and evening timepoints while modulating neurons linking DN1ps to the EB. Morning times are matched with evening time points with similar baselines. (B) Enhancerless-Gal4 control flies ( $pBDP > Kir$ ) ( $N=21$ ) exhibit greater rebound in the morning compared to a matched evening time point ( $P < 0.01$ , paired t-test). (C) Flies with TuBu neurons silenced ( $R52B02 > Kir$ ) ( $N=21$ ) do not exhibit a difference in rebound between matched morning/evening time points ( $P > 0.38$ , paired t-test). (D) Enhancerless-Gal4 driver paired with UAS-GluR-RNAi ( $pBDP > GluR RNAi$ ) control ( $N=32$ ) exhibit greater rebound in the morning compared to matched evening time point ( $P < 0.00001$ , paired t-test). (E) Flies with KD of GluR in TuBu neurons ( $R52B02 > GluR RNAi$ ) do not exhibit a significant difference between matched morning/evening time points ( $P > 0.28$ , paired t-test). (F) Flies with R2/R4m neurons silenced ( $R20D01 > Kir$ ) ( $N=32$ ) do not exhibit a significant difference in rebound between matched morning/evening time points ( $P > 0.26$ , paired t-test). Data are means  $\pm$  SEM.

233

234 To determine if these neurons are important for sleep homeostasis, we first tested Gal4

235 drivers previously used to mark these neurons (Guo et al., 2018; Lamaze et al., 2018; Liang et

236 al., 2019; Liu et al., 2016) in combination with *hid*, but found that in many cases (*R52B02*,



237 *R20D01*) they were lethal, likely due to broader anatomic and/or developmental expression. So  
238 instead we used the inward rectifying potassium channel Kir2.1(Baines et al., 2001) to silence  
239 these neurons and examined sleep rebound in the morning and evening. Silencing of a previously  
240 used driver (*R92H07*) that labels superior projecting TuBu neurons had no effect on rebound  
241 (Supplemental Fig. 4c,d). We identified another GAL4 driver (*R52B02*) that labels the superior  
242 and anterior and/or inferior subgroups previously implicated in sleep regulation(Guo et al., 2018;  
243 Jenett et al., 2012; Lamaze et al., 2018; Pfeiffer et al., 2008). We used this line in combination  
244 with Kir2.1 and found that the difference between morning and evening rebound was lost,  
245 similar to what was observed after Glu<sup>+</sup> DN1p ablation (Fig. 4b,c). We knocked down the  
246 expression of a metabotropic glutamate receptor (mGluR) in these neurons using RNAi (Guo et  
247 al., 2016) and observed phenotypes very similar to silencing them (Fig 4d,e). To determine  
248 which neurons are acting downstream of TuBu, we targeted the R2/R4m neurons using  
249 *R20D01*(Lamaze et al., 2018). Silencing these neurons with Kir2.1 eliminated the difference  
250 between rebound in the morning and evening, phenocopying Glu<sup>+</sup> DN1p ablation and TuBu  
251 silencing (Fig. 4f). Taken together, these results demonstrate a role for the DN1p-Tubu-R2/R4m  
252 circuit in regulating time-dependent sleep rebound.

253

#### 254 **PDF<sup>-</sup> sLN<sub>v</sub> and LN<sub>d</sub>s mediate evening suppression of sleep rebound**

255 To determine the cellular basis of the evening rebound phenotype, we selectively ablated 2-3  
256 LN<sub>d</sub>s and the 5th sLN<sub>v</sub> (4 neurons) using the highly specific MB122B split Gal4 line(Guo et al.,  
257 2017). This manipulation resulted in a large (>6 fold) increase in rebound in the evening (at  
258 ZT9.5 control ~22 min, *MB122B*~ 141 min) and a more modest (~1.5 fold) effect in the morning  
259 (at ZT1.5 control~ 104 min, *MB122B* ~157 min) (Fig. 5a, b). We observed similar results with

260 Kir2.1 (Fig. 5f, g). Surprisingly we did not observe significant effects on baseline sleep levels  
 261 (Fig. 5c, h) or anticipation by ablation or silencing (Fig. 5d-e, i-j). Differences between these  
 262 baseline anticipation results and previously observed silencing effects on sleep may be due the  
 263 use of constitutive versus inducible silencing(Guo et al., 2017). Nonetheless, these results  
 264 indicate that effects on rebound are largely independent of baseline anticipation/sleep levels.  
 265 Thus, just 4 PDF<sup>-</sup> LN<sub>d</sub>/sLN<sub>v</sub> cells are essential for clock control of rebound with an especially  
 266 strong suppressive effect in the evening.

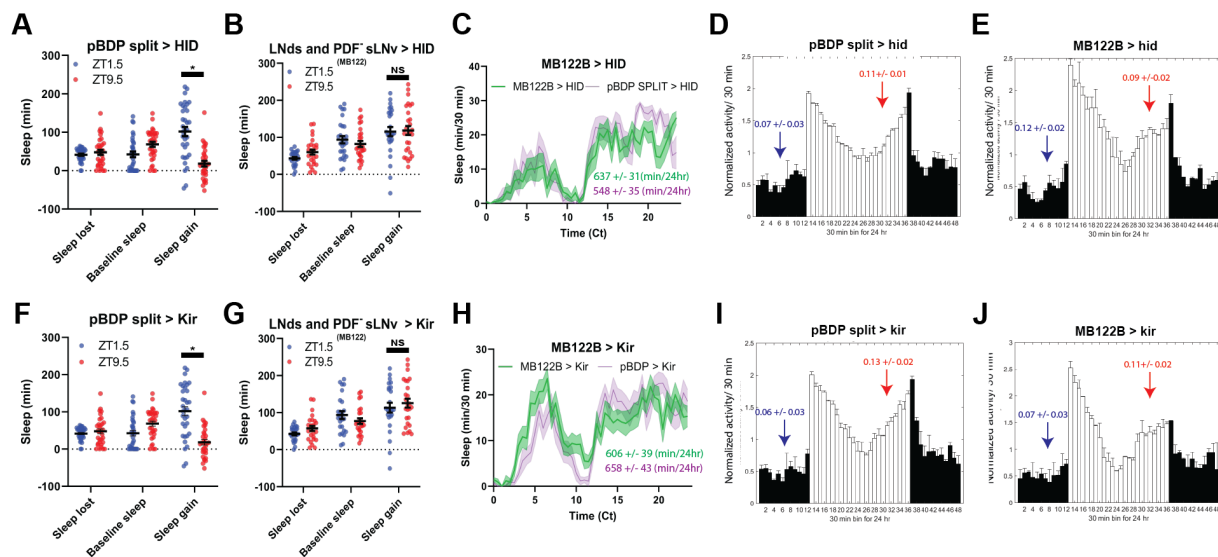

**Figure 5: LNDs and the PDF- sLNv suppress evening rebound**

(A,B,F,G) Comparison of sleep lost, baseline sleep, and sleep gain following deprivation at morning and evening timepoints in clock neuron-ablated flies. Morning times are matched with evening time points with similar baselines. (A) Control flies with no ablated neurons (pBDP split > hid) (N=26) exhibit greater rebound in the morning compared to matched evening time point (P<0.0001, paired t-test). (B) Flies with 2-3 LN<sub>d</sub>s and the PDF<sup>-</sup> sLN<sub>v</sub> ablated (MB122B > hid) (N=30) do not exhibit a significant difference in sleep gain between matched morning/evening time points (P>0.50, paired t-test). (F) Control flies with no silenced neurons (pBDP split > kir) (N=34) exhibit greater rebound in the morning compared to matched evening time point (P<0.0001, paired t-test). (G) Flies with 2-3 LN<sub>d</sub>s and the PDF<sup>-</sup> sLN<sub>v</sub> silenced (MB122B > kir) (N=31) do not exhibit a significant difference in sleep gain between matched morning/evening time points (P>0.45, paired t-test). Data are means ± SEM. (C,H) Average sleep during the baseline day. (C) LN<sub>d</sub>s and the PDF<sup>-</sup> sLN<sub>v</sub> ablated (MB122B > hid) (N=30) (green) and control (pBDP split > hid) (N=26) (purple). (H) 2-3 LN<sub>d</sub>s and the PDF<sup>-</sup> sLN<sub>v</sub> silenced (MB122B > kir) (N=31) (green) and control (pBDP split > kir) (N=34) (purple). Sleep per 24 hours is indicated in the bottom right. (D,E,I,J) Averaged activity reductions for female flies during the first 2 days of 12:12 LD. Light phase is indicated by white bars while the dark phase is indicated by black bars. Morning and evening anticipation indices are represented in blue and red respectively.

267



268 **PPM3, R5 and dFB neuron synaptic output is required for intact sleep homeostasis**

269 The PPM3 and R5 neurons have been implicated as downstream of the LN<sub>d</sub> (Fig 6a). To test the  
270 effects of PPM3 on sleep homeostasis we blocked synaptic transmission by expressing tetanus  
271 toxin (TNT) (Sweeney et al., 1995) using *R92G05-Gal4* (Liang et al., 2019). As LN<sub>d</sub> calcium  
272 oscillations are synchronized with those in the PPM3, we hypothesized that PPM3 silencing may  
273 phenocopy LN<sub>d</sub> ablation, i.e., increasing rebound in the evening. However, PPM3 silencing  
274 dramatically reduced rebound in both the morning and the evening with little difference between  
275 the two times (ZT1.5 and ZT8.5), suggesting that PPM3 are not mediating LN<sub>d</sub> effects (Fig.  
276 6c,d). Like the PPM3 neurons, blocking R5 synaptic output using a novel split GAL4 (*R58H05*  
277 *AD; R48H04 DBD*) (Fig 6b) also reduced rebound in both morning and evening, consistent with  
278 the role of these neurons in mediating rebound from 12 h SD (Liu et al., 2016) (Fig 6e,f).  
279 Moreover, no difference between morning and evening rebound was evident. R5 neurons  
280 promote sleep in response to deprivation by activating the sleep promoting dFB (Liu et al.,  
281 2016). Thus, we also blocked synaptic output from the dFB using TNT. Rebound was reduced as  
282 previously reported (Qian et al., 2017) but without any morning/evening difference, just as it was  
283 for PPM3 and R5 (Fig. 6g,h). Although the exact nature of the PPM3 input remains an open  
284 question, these studies highlight a role for a PPM3-R5-dFB pathway in rebound sleep in  
285 response to deprivation at all times of day even with shorter deprivation protocols.

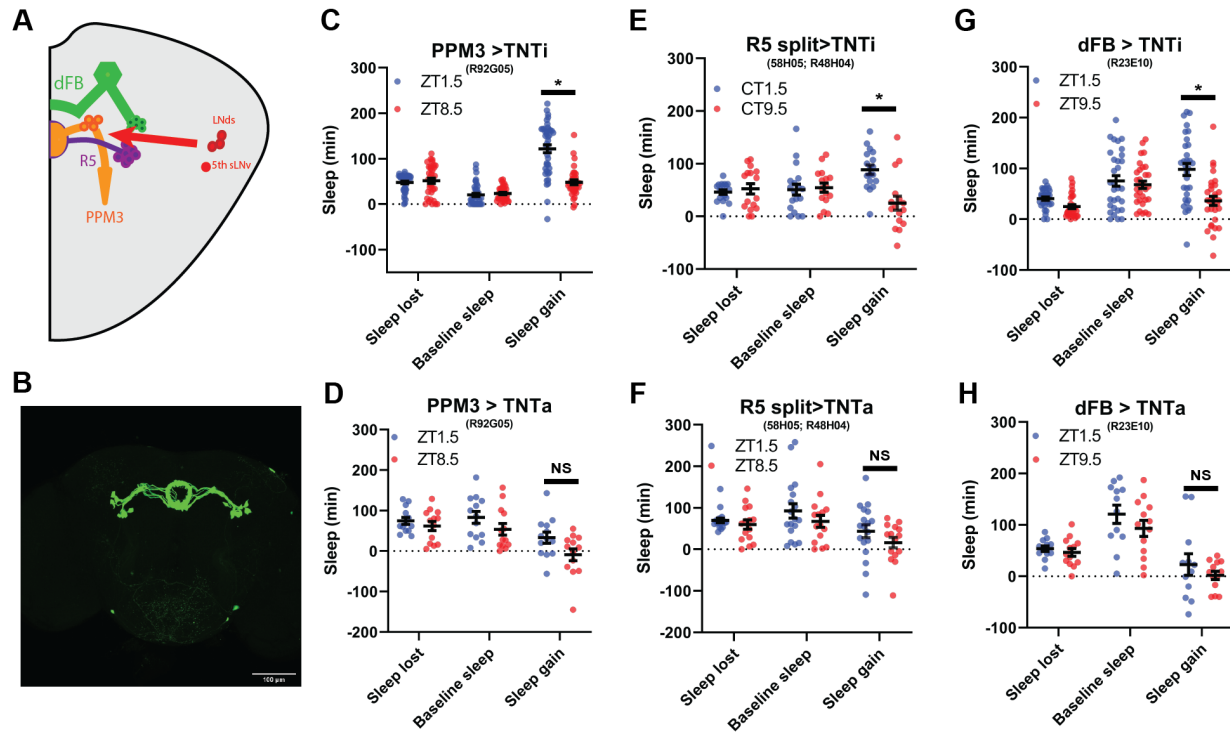

**Figure 6: PPM3 supply evening suppressing homeostatic signal to R5 ellipsoid body neurons**

(A) Cartoon illustrating link between LNDs and 5th sLNv and dFB via with PPM3 and R5 intermediates. (B) GFP Expression pattern of split Gal4 line that labels Glu+ Dn1ps (R58H05 AD; R48H04 DBD > GFP) at 20x. (C-H) Comparison of sleep lost, baseline sleep, and sleep gain following deprivation at morning and evening timepoints modulating neurons linking LND activity to the EB. Morning times are matched with evening time points with similar baselines. (C) Flies expressing an inactive form of tetanus toxin in PPM3 neurons (R92G05 > TNTi)(N=45) exhibit greater rebound in the morning than at a matched evening time point ( $P < 0.0001$ , paired t-test). (D) Silencing PPM3 neurons with an active form of tetanus toxin (R92G05 > TNTa)(N=27) resulted in no significant difference between matched morning/evening time points ( $P > 0.10$ , paired t-test). (E) Flies expressing an inactive form of tetanus toxin in R5 neurons (R58H05 AD; R48H04 DBD > TNTi) (N=21) exhibit greater rebound in the morning than at a matched evening time point ( $P < 0.01$ , paired t-test). (F) Silencing R5 neurons with tetanus toxin (R58H05 AD; R48H04 DBD > TNTa) (N=16) resulted in no significant difference in sleep gain for matched morning and evening time points ( $P > 0.70$ , paired t-test). (G) Flies expressing an inactive form of tetanus toxin in the dFB (R23E10 > TNTi) (N=30) exhibit greater rebound in the morning than at a matched evening time point ( $P < 0.0001$ , paired t-test). (H) Silencing dFB neurons with tetanus toxin (R23E10 > TNTa)(N=12) resulted in no significant difference between morning and evening time points ( $P > 0.45$ , paired t-test).

286

## 287 **R5 ellipsoid body neurons exhibit elevated expression of activity-dependent and**

## 288 **presynaptic genes in the morning relative to the evening**

289 To ascertain how the circadian system may impact the R5 homeostat, we examined molecular

290 and physiological changes in R5 as a function of time and sleep need. Interestingly, activation

291 and deprivation studies have focused exclusively on morning rebound. To identify time- and

292 wake-dependent gene expression in an unbiased manner, we selectively labeled R5 neurons (Fig

293 6b, *R58H05 AD; R48H04 DBD > GFP*) and subjected flies to 2.5 h of mechanical SD in either  
294 the morning or evening. We then isolated R5 neurons from control or SD flies at ZT1 and ZT9  
295 using fluorescence-activated cell sorting and subjected them to RNA-sequencing.

296         Based on our behavioral data, we hypothesized that morning SD would induce  
297 differential gene expression compared to control flies that did not receive SD while evening SD  
298 would not be sufficient to induce changes in gene expression compared to controls. We were  
299 surprised to find that neither morning nor evening SD had much of an effect on gene expression  
300 in the R5 neurons (Fig 7a,b). In the morning, only two genes were significantly differentially  
301 expressed ( $q < 0.1$ , *Hsp70Bb* and *stv*). Likewise, in the evening, only four genes were significantly  
302 differentially expressed ( $q < 0.1$ , *CG5522*, *CG13285*, *mt:ND5*, and *Hsp70Bb*). In stark contrast,  
303 comparisons of morning and evening timepoints with or without sleep deprivation (Morning  
304 Control (MC) vs Evening Control (EC), Morning SD (MSD) vs Evening SD (ESD), or MC +  
305 MSD vs EC + ESD) produces 46-128 differentially expressed genes ( $q < 0.1$ , Fig 7c,d,e). Notably,  
306 this time of day dependent regulation does not appear to be driven by core clock genes in these  
307 neurons (Supplemental Fig 5). *Clk* is detected in only 2 out of 12 samples and only at very low  
308 levels in those samples. Also the expression of other clock genes like *per* and *tim* is not  
309 fluctuating between the two timepoints.

310

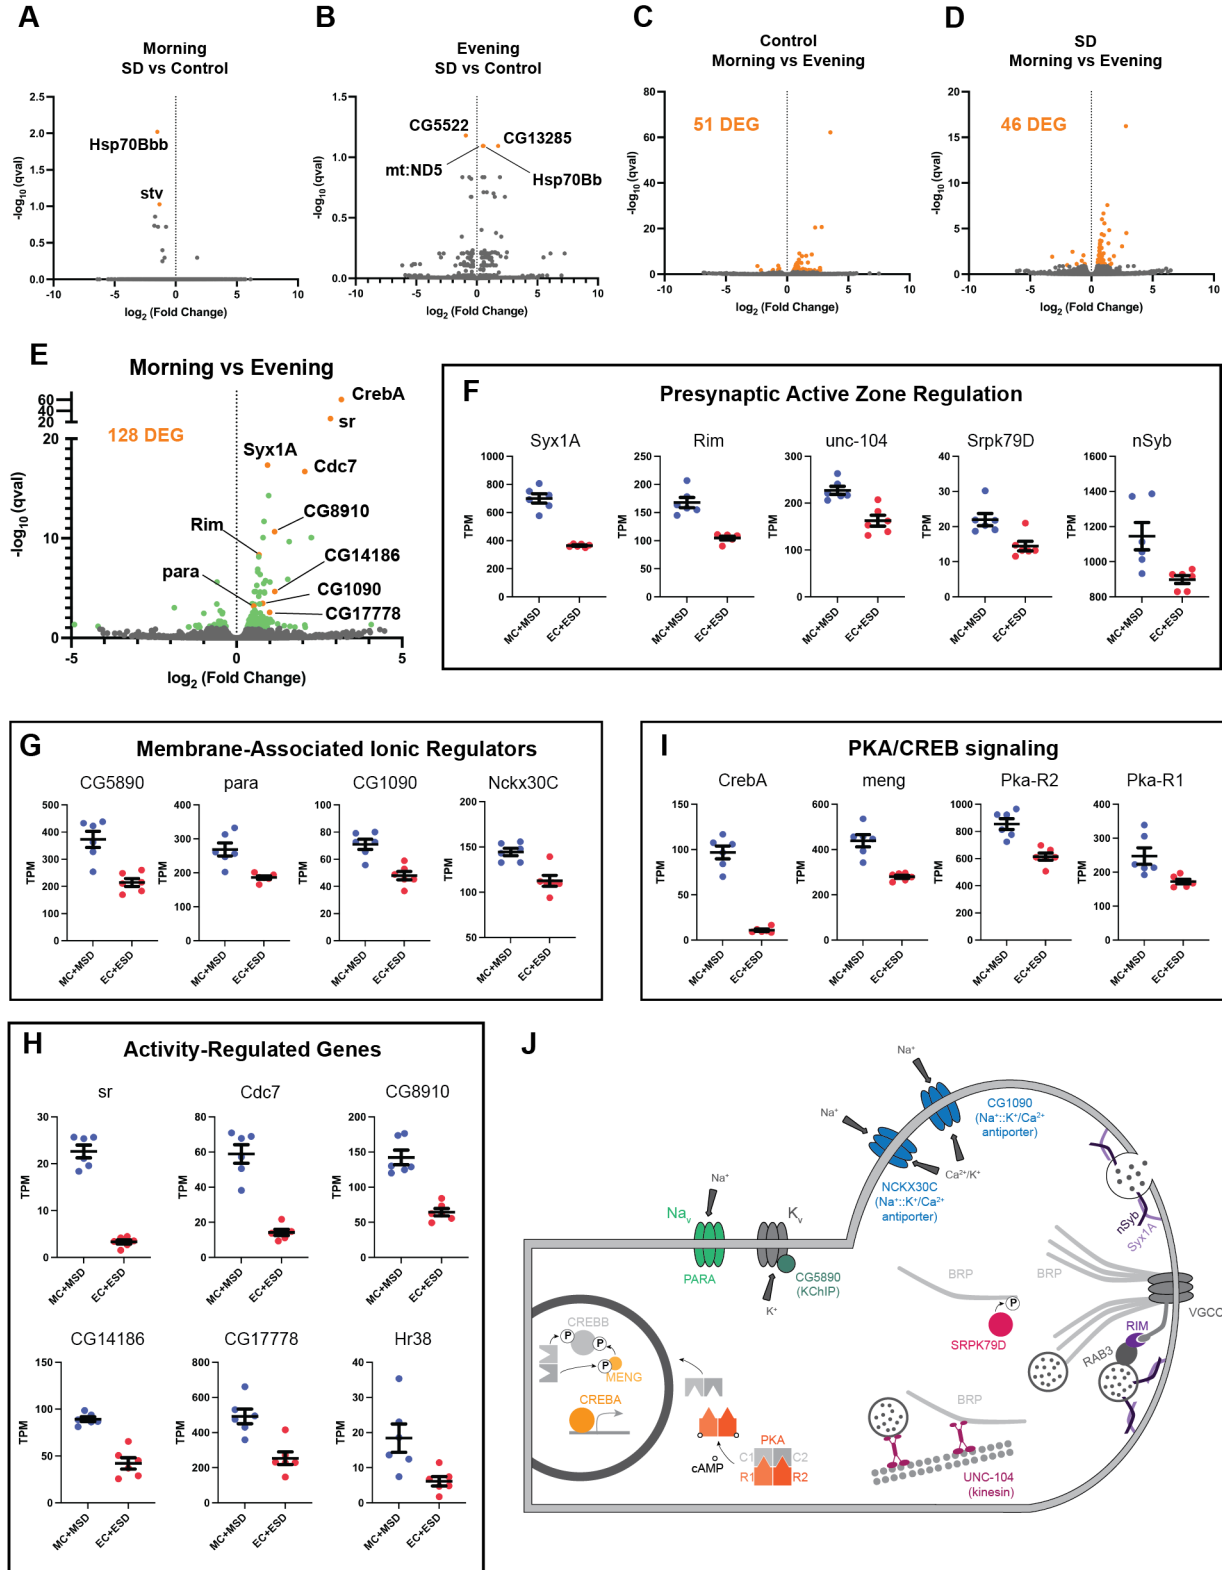

311

312

313 **Figure 7: RNA sequencing of FAC-sorted R5 neurons suggests elevated activity in the morning**  
314 (A) Volcano plot (fold change versus  $q_{val}$ ) of Morning SD (MSD) vs Morning Control (MC) gene expression.  
315 Significantly differentially expressed genes shown in orange. (B) Volcano plot of Evening SD (ESD) vs Evening  
316 Control (MC) gene expression. Significantly differentially expressed genes shown in orange. (C) Volcano plot of  
317 MC vs EC gene expression. 51 significantly differentially expressed genes (DEG) were identified and are shown in  
318 orange. (D) Volcano plot of MSD vs ESD gene expression. 46 significantly differentially expressed genes (DEG)  
319 were identified and are shown in orange. (E) Volcano plot of MC+MSD vs EC+ESD gene expression. Differentially  
320 expressed genes are shown in green with a few genes highlighted in orange and labeled. (F-I) Scatter plots for  
321 several differentially expressed genes. Transcripts Per Kilobase Million (TPM) is shown for each sample. All  
322 morning samples are grouped and all evening samples are grouped. Graphs are grouped by similar functions: (F)  
323 active zone components/regulators, (G) membrane-associated ionic regulators, (H) activity-regulated genes, (I)  
324 PKA/CREB signaling. (J) Schematic of select morning upregulated genes. Upregulated genes are shown in color  
325 while other interacting components are depicted in gray. PARA and CG5890 are both involved in the generation and  
326 propagation of action potentials. Multiple active zone components/regulators (NSYB, SYX1A, RIM, SRPK79D,  
327 UNC-104) interact with BRP and voltage-gated calcium channels (VGCCs) to support neuronal output and  
328 intracellular calcium influx. Elevated levels of intracellular calcium are regulated by the antiporters NCKX30C and  
329 CG1090. Second messenger cAMP interacts with regulatory subunits of PKA (R1/R2) and releases the catalytic  
330 subunits (C1/C2) to phosphorylate CREBB and MENG, stabilizing CREBB. CREBA acts as a transcriptional  
331 activator independent of PKA activity.  
332

333 To understand what sorts of molecular programs are undergoing differential regulation  
334 between morning and evening, we examined gene ontologies of genes upregulated in the  
335 morning. These terms include cellular components like “presynaptic active zone”, “synaptic  
336 vesicle”, “terminal bouton”, and “cAMP-dependent protein kinase complex”, as well as  
337 molecular functions like “calcium ion binding” and “calcium, potassium::sodium antiporter  
338 activity”. The genes identified in these categories suggest a temporally regulated state of activity  
339 for the R5 neurons. Indeed, major active zone regulators such as *Syx1A*, *Rim*, *unc-104*, *Srp79D*,  
340 and *nSyb* are all significantly upregulated in the morning (Fig 7e,f). *Syx1A*, *Rim*, and *nSyb* are  
341 part of the synaptic vesicle docking and exocytosis machinery and *Rim* also regulates the readily-  
342 releasable pool of synaptic vesicles, playing a major role in presynaptic homeostasis (Broadie et  
343 al., 1995; Muller et al., 2012). *unc-104* is involved in trafficking of synaptic vesicles and BRP to  
344 the active zone (Zhang et al., 2017) and the kinase *Srp79D* regulates trafficking and deposition  
345 of BRP at active zones via phosphorylation of its N-terminus (Johnson et al., 2009; Nieratschker  
346 et al., 2009). We also observed significant upregulation of genes involved in ionic transport  
347 across the plasma membrane, including *para*, a voltage-gated sodium channel (Catterall, 2000;

348 Loughney et al., 1989), and *CG5890*, a predicted potassium channel-interacting protein (KChIP)  
349 (Fig 7e,g). Mammalian KChIPs have been shown to interact with voltage-gated potassium  
350 channels, increasing current density and conductance and slowing inactivation(An et al., 2000).  
351 Two sodium::potassium/calcium antiporters, *CG1090* and *Nckx30C*, were also upregulated (Fig  
352 7e,g). These antiporters function primarily in calcium homeostasis by using extracellular sodium  
353 and intracellular potassium gradients to pump intracellular calcium out of the cell when calcium  
354 levels are elevated(Haug-Collet et al., 1999). Amongst the most significantly upregulated genes  
355 in our dataset, we found six genes that were previously identified as activity-regulated genes in  
356 *Drosophila* (ARGs; *sr*, *Cdc7* (also known as *l(1)G0148*), *CG8910*, *CG14186*, *CG17778*, *hr38*)  
357 (Fig 7e,h). These genes are analogous to immediate early genes in mammals and represent half  
358 of a group of twelve genes that were induced in three distinct paradigms of neuronal  
359 stimulation(Chen et al., 2016). Finally, we found that several critical components of Creb  
360 signaling were enriched in the morning in R5 neurons (Fig 7e,i). *CrebA* was the most  
361 significantly upregulated gene in the morning samples, though we also saw significant increases  
362 in *meng*, which encodes a kinase that works synergistically with the catalytic subunits of PKA to  
363 phosphorylate and stabilize CREBB(Lee et al., 2018), as well as both regulatory subunits of  
364 PKA (*Pka-R1*, *Pka-R2*) (Fig 7e,i). CREBA and CREBB likely serve different roles, but appear to  
365 be involved in activity-dependent processes like dendritogenesis and long term memory(Iyer et  
366 al., 2013; Yin et al., 1995).

367         Synthesizing these data, it appears that a complex time-dependent program of  
368 transcriptional regulation is in play in the morning to upregulate the activity of R5 neurons (Fig  
369 7j). Upregulation of *unc-104*, *SrpK79D*, *Syx1a*, *Rim*, and *nSyb* suggests that R5 neurons are  
370 assembling a greater number of mature active zones for neuronal output. Upregulation of *para*

371 and the predicted KChIP *CG5890*, which should increase the voltage-gated conductance of  
372 sodium and potassium ions across the membrane, supports the idea that R5 neurons may be  
373 primed for greater action potentials in the morning. Upregulation of the two  
374 sodium:potassium/calcium antiporters suggests that intracellular calcium levels are elevated in  
375 the morning, again consistent with the idea that these neurons are more active in the morning.  
376 Significantly elevated levels of six ARGs also support this conclusion. Finally, there is some  
377 suggestion that the elevated activity may result in plasticity in the R5 neurons supported by PKA  
378 and CREB signaling.

### 379 **R5 neurons exhibit time dependent changes in BRP and calcium response to SD**

380 SD/extended wake results in the upregulation of many synaptic proteins (Gilestro et al., 2009).  
381 Most notable is the presynaptic scaffolding protein BRP, important for synaptic  
382 release(Matkovic et al., 2013), and is upregulated in the R5 neurons following 12 hrs of SD (Liu  
383 et al., 2016). KD of *Brp* in R5 neurons decreases rebound response to SD (Huang et al., 2020),  
384 suggesting that it is necessary for accumulating and/or communicating homeostatic drive. We  
385 hypothesized that differences in the propensity for R5 to induce sleep rebound in the  
386 morning/evening may be due to changes in synaptic strength that can be observed by tracking  
387 levels of BRP.

388 To test this idea, we used the synaptic tagging with recombination (STaR) system to  
389 selectively express a V5 epitope-tagged BRP in R5 neurons using the FLP/FRT system (Chen et  
390 al., 2014) as previously reported (Liu et al., 2016). We examined BRP at ZT1.5 and ZT9.5 with  
391 and without SD and found that BRP levels are higher at ZT1.5 than ZT 9.5 (Fig. 8a, b).  
392 Interestingly, 2.5 h SD had no effect on BRP intensity at either time point (Fig. 8b). It is possible  
393 that BRP changes in response to 2.5 h of SD are not observable, while a longer 12 h deprivation



394 is required to induce sufficient changes for observation(Liu et al., 2016). As reduced BRP  
395 expression in the R5 reduces rebound (Huang et al., 2020), it is possible that clock-dependent  
396 changes in expression of BRP and associated presynaptic modifications are driving the  
397 difference in rebound observed in morning/evening.

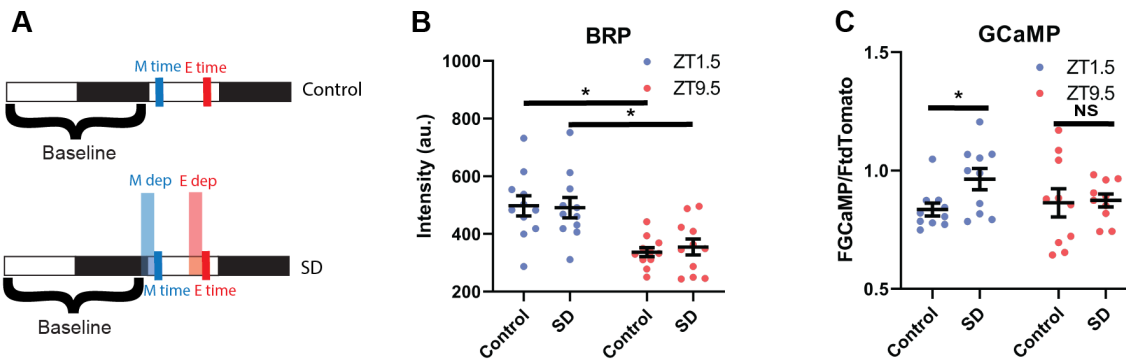

**Figure 8: R5 neurons exhibit time dependent changes in BRP and Calcium response to SD**

(A) Schematic illustrating deprivation and dissection timing for morning (M) and evening (E) with (lower) and without (upper) SD. (B) Fluorescence of BRP-STaR in R5 projections as a function of time of day and SD. Intensity of BRP staining is decreased in the evening compared to morning in both control (N= 11, 11)( $P < 0.001$ , independent t-test) and SD (N= 11, 11) ( $P < 0.01$ , independent t-test) groups. Intensity of BRP staining is not affected by SD in the morning (N=11,11) ( $P > 0.90$ , independent t-test) or evening (N=11,11) ( $P > 0.58$ , independent t-test). (C). GCaMP expression in R5 projections (R69F08 > GCaMP6s) at ZT1.5 and ZT9.5 with and without SD. GCaMP fluorescence was normalized to the tdTomato fluorescence signal intensity. There is no difference in normalized GCaMP6s signaling between baseline morning (N=10) and evening (N=10) time points. SD in the morning (N=10) increases GCaMP6s intensity ( $P < 0.05$ , independent t-test) but not in the evening (N=10) ( $P > 0.87$  independent t-test), independent t-test). Data are means +/- SEM.

398  
399 The calcium concentration in R5 neurons increases following twelve hours of SD,  
400 suggesting that extended wakefulness can induce calcium signaling in these neurons. Blocking  
401 the induction of calcium greatly reduces rebound, supporting a critical role for calcium signaling  
402 in behavioral output(Liu et al., 2016). Furthermore, R5 neurons display morning and evening  
403 cell-dependent peaks in calcium activity across the course of the day indicating that calcium is  
404 also modulated by the clock network (Liang et al., 2019). It is unclear whether the circadian  
405 clock can modulate wake-dependent changes in calcium activity in the R5 neurons.

406 To test this idea, we expressed the calcium reporter GCaMP6s (Chen et al., 2013) in the  
407 R5 and examined calcium in the morning (ZT1.5) and evening (ZT9.5) with and without SD



408 (Fig. 8a). Interestingly there was no difference between the non-SD flies at each time point (Fig.  
409 8c). This may be because the morning time point resides on the down-swing of the morning-peak  
410 of R5 calcium activity while the evening time point resides on the upswing of the evening  
411 calcium peak (Liang et al., 2019). Nonetheless, an SD induced increase in calcium was observed  
412 in the morning but suppressed in the evening (Fig. 8c), suggesting that the R5 sensitivity to sleep  
413 deprivation is gated by the clock.

#### 414 **Discussion**

415 Here we describe the neural circuit and molecular mechanisms by which discrete populations of  
416 the circadian clock network program the R5 sleep homeostat to control the homeostatic response  
417 to sleep loss. We developed a novel protocol to administer brief duration SD and robustly  
418 measure homeostatic rebound sleep. Using this strategy, we demonstrated that homeostatic  
419 rebound is significantly higher in the morning than in the evening. We then identified distinct  
420 subsets of the circadian clock network and their downstream neural targets that mediate the  
421 enhancement and suppression of morning and evening rebound respectively. Using unbiased  
422 transcriptomics, we observed very little gene expression significantly altered in response to our  
423 2.5 h sleep deprivation. On the other hand, we did identify elevated expression of activity-  
424 dependent and presynaptic genes in the morning independent of sleep deprivation. Consistent  
425 with this finding, we also observe elevated levels of the presynaptic protein BRP. These baseline  
426 changes are accompanied by an elevated calcium response to sleep deprivation in the morning  
427 mirroring the enhanced behavioral rebound in the morning. Taken together, our data support the  
428 model of a circadian regulated homeostat that turns the homeostat up late at night to sustain sleep  
429 and down late in the day to sustain wake.

430 Our studies suggest that homeostatic drive in the R5 neurons is stored post-  
431 transcriptionally. As part of our studies, we developed a novel protocol using minimal amounts  
432 of SD which could be useful for minimizing mechanical stress effects and isolating underlying  
433 molecular processes crucial for sleep homeostasis. 6-24 hours of SD in *Drosophila* is commonly  
434 used despite the potential stressful or even lethal effects(R. W. Fernandez et al., 2014; Shaw et  
435 al., 2002; Vaccaro et al., 2020). Here we demonstrate that shorter 2.5 hour deprivations not only  
436 induce a robust rebound sleep response (Fig. 2), but also the percent of sleep lost recovered at  
437 ZT0 is close to 100% versus 14-35% seen in 12 h SD protocols(Blum et al., 2021; Kayser et al.,  
438 2014; Nall & Sehgal, 2013; Oh et al., 2014). Using this shorter SD, we now find that many  
439 effects observed in R5 neurons with 12 h SD (e.g., increased BRP and upregulation of *nmdar*  
440 subunits) are no longer observed with shorter SD, even though the necessity of R5 neurons for  
441 rebound is retained after 2.5 h SD (Fig. 6e,f). Previously, translating ribosome affinity  
442 purification (TRAP) was used to show upregulation of *nmdar* subunits following 12 h SD(Liu et  
443 al., 2016). FACS and TRAP are distinct methodologies for targeted collection of RNA for  
444 sequencing and can yield unique gene lists(Cedernaes et al., 2019). One possibility is that  
445 upregulation of *nmdar* subunits is occurring locally in neuronal processes, which are often lost  
446 during FACS, and/or is at the level of translation initiation or elongation. Nonetheless, in  
447 agreement with previous work, we observed SD-induced increases in calcium correlated with  
448 behavioral rebound, suggesting that this process is a core feature of the cellular homeostatic  
449 response.

450 Using genetically targeted “loss-of-function” manipulations, we have defined small  
451 subsets of circadian clock neurons and downstream circuits that are necessary for intact clock  
452 modulation of sleep homeostasis. The use of intersectional approaches enabled highly resolved

453 targeting not possible with traditional lesioning experiments in the SCN(Easton et al., 2004).  
454 Collectively our studies defined a Glu<sup>+</sup> DN1p-TuBu-R4m circuit important for enhancing  
455 morning rebound as well as a discrete group of LNds important for suppressing evening rebound.  
456 Importantly, most of these effects on sleep rebound are evident in the absence of substantial  
457 changes in baseline activity, despite other studies indicating their necessity for normal circadian  
458 behavior. Of note, the proposed roles of the DN1p and LNd clock neurons are sleep(Guo et al.,  
459 2016) and wake promotion(Guo et al., 2018) consistent with our findings after sleep deprivation.  
460 We hypothesize that by using chronic silencing methods, baseline effects may not be evident due  
461 to compensatory changes but that these effects are only revealed when the system is challenged  
462 by sleep deprivation. Similar genetic strategies in mammals (see (Collins et al., 2020)) may be  
463 useful in uncovering which SCN neurons are driving circadian regulation of sleep homeostasis  
464 given the comparable suppression of sleep rebound in the evening in humans (Dijk & Czeisler,  
465 1994, 1995; Dijk & Duffy, 1999; Lazar et al., 2015). Nonetheless, the finding of sleep  
466 homeostasis phenotypes in the absence of significant baseline effects suggests that a major role  
467 of these clock neuron subsets may be to manage homeostatic responses.

468         Our studies suggest that circadian and homeostatic processes do not compete for  
469 influence on a downstream neural target but that the circadian clock programs the homeostat  
470 itself. Using an unbiased transcriptomic approach, we discovered time-dependent expression of  
471 activity dependent and presynaptic genes (Fig. 7), consistent with previous data that the R5  
472 neurons exhibit time-dependent activity(Liang et al., 2019; Liu et al., 2016). We observed  
473 significant upregulation of several genes involved in synaptic transmission (*Syx1a*, *Rim*, *nSyb*,  
474 *unc-104*, *Srpk79D*, *para*, *CG5890*) evincing a permissive active state for R5 neurons in the  
475 morning. This is accompanied by elevated levels of the key presynaptic protein BRP in the

476 morning compared to evening. It is notable that elevated BRP in the morning is the opposite of  
477 what would be expected based on a sleep-dependent reduction in BRP proposed by the synaptic  
478 homeostasis hypothesis(Tononi & Cirelli, 2014), suggesting a sleep-wake independent  
479 mechanism. Previous studies have shown that modulation of BRP levels in the R5 are important  
480 for its sleep function(Huang et al., 2020), suggesting that changes in BRP levels impact R5  
481 function. We hypothesize that these baseline transcriptomic changes underlie the differential R5  
482 sensitivity to sleep deprivation is evident as calcium increases in the morning and not the  
483 evening. Indeed, transcriptomic and proteomic studies of the mouse forebrain across time and  
484 after sleep deprivation are consistent with the model that the circadian clock programs the  
485 transcriptome while homeostatic process function post-transcriptionally(Bruning et al., 2019;  
486 Noya et al., 2019), paralleling what we have found for R5. It will be of great interest to  
487 understand the circuit and molecular mechanisms by which circadian clocks regulate the R5  
488 neuronal calcium and synaptic properties and whether similar circuit architectures underlie daily  
489 mammalian sleep-wake.

490

491

492

493

494

#### 495 **Acknowledgements**

496 We would like to thank the bloomington stock center and the vienna drosophila resource center  
497 for reagents. We thank the Flow Cytometry Core and NU seq at Northwestern University for  
498 their assistance in cell sorting and sequencing . We are grateful to the members of our neighbors  
499 in the Gallio, Bass and Turek labs for their advice. This work was supported by National  
500 Institutes of Health (NIH) grant (R01NS106955 ), Dept. of Army grant (W911NF1610584),

501 Training Grants in Circadian and Sleep Research ( HL 7909-19 and HL007909), and  
502 postdoctoral NRSA grant (NS110183).

503  
504

505

506 **Author contributions:**

507 R.A., C.R., and T.A.;Methodology, E.O and S.S.; Software, R.A., C.R., and T.A.;  
508 Conceptualization, T.A., C.R.; Investigation, T.A., C.R., and S.S.; Formal Analysis, T.A.,C.R.,  
509 and E.O.; Data Curation, R.A., C.R., and T.A.;Writing-Original Draft, W.K.;Validation, R.A.  
510 and C.R.; Supervision, R.A. and C.R.; Project Administration, R.A. and C.R., and T.A.;Funding  
511 acquisition.

512

513 **Declaration of interests**

514 The authors declare no competing interest

515

516 **Methods**

517 **Fly husbandry and strains**

518 Flies were maintained on a media of sucrose, yeast, molasses, and agar under 12:12 LD cycles at  
519 25°C. 1-3 day old female flies were separated and maintained on standard cornmeal-yeast  
520 medium under 12:12 LD cycles at 25°C for 4 nights before experiments began. *Clk*[out] (56754),  
521 *per<sup>s</sup>* (80919), *pdf-Gal4* (6899), pBDP (*pBDP-Gal4Uw*)(68384), pBDP split (*p65-AD Uw; Gal4-*  
522 *DBD Uw*) (79603), *R23E10-Gal4* (49032), *R69F08-Gal4* (39499), *R58H05 p59AD* (70750),  
523 *R48H04 DBD* (69353) *pdf-Gal80* (80940), *R51H05 p65AD* (70720), *R18H11 DBD* (69017),  
524 *R92H07-Gal4* (40633), *R52B02-Gal4* (38814), *R20D01-Gal4* (48889), BRPstar (55751), *UAS-*  
525 *GCaMP6s* (42746), *UAS-TNT* (28838), *UAS-kir2.1* (6596) and *UAS-hid* (65403) were obtained  
526 from the Bloomington Drosophila Stock Center. *mGluR-RNAi* (1793) was obtained from Vienna

527 Drosophila Resource Center. *MB122B* and *20xUas-IVS-Syn-GFP* was obtained from Janelia  
528 Farm.

529

### 530 **Behavioral assays**

531 Following aging and entrainment, 4-7 day old flies were placed in individual 5×65 mm glass  
532 capillary tubes containing sucrose-agar food (5% sucrose and 2% agar). These were then loaded  
533 into the Drosophila activity monitor (DAM) system (Trikinetics, Waltham, Massachusetts, USA)  
534 and placed in either an empty incubator or, in the case of SD experiments, on a multi-tube  
535 vortexer (VWR-2500) fitted with a mounting plate (Trikinetics, Waltham, Massachusetts, USA).

536 For SD experiments 3 nights (with 2 full days) of undisturbed sleep in 12:12 LD cycling  
537 at 25°C served as an acclimation period and baseline. Following the baseline period, SD  
538 mechanical stimuli was performed as previously described (Nall & Sehgal, 2013). A 2 second  
539 vibration stimulus was applied approximately every 20 seconds with a randomized protocol for a  
540 time period of 2.5 hours. In the case of the forced desynchrony protocol this 2.5 hour stimulus  
541 was repeated every 7 hours (allowing for a total of 4.5 hours of rest following each stimulus) 24  
542 times until SD occurred at each hour around the clock (Fig. 1a). In abridged experiments this 2.5  
543 hour stimulus was applied 5 times: ZT0, ZT8 and ZT23 of day 3, ZT7 of day 4 and ZT6 of day  
544 5.

545 For sleep analyses DAM data was processed using custom Java and MATLAB based  
546 software. Activity was measured in 1 minute bins and sleep was identified as 5 minutes of  
547 inactivity (Hendricks et al., 2000). For SD experiments only flies deprived of >90% of baseline  
548 sleep at each SD interval were analyzed (Pfeiffenberger & Allada, 2012). Sleep gain was  
549 calculated as the difference between sleep during rebound and sleep during the equivalent 4.5

550 hours at baseline. Activity actograms were plotted with Counting Macro as previously described  
551 (Pfeiffenberger et al., 2010a, 2010b).

552

### 553 **Immunostaining**

554 Following aging and entrainment, 4-7 day old flies were placed in individual tubes containing  
555 sucrose-agar food (5% sucrose and 2% agar) for 3 nights. Brains were dissected in PBS (137mM  
556 NaCl, 2.7mM KCl, 10mM Na<sub>2</sub>HPO<sub>4</sub> and 1.8mM KH<sub>2</sub>PO<sub>4</sub>) and fixed in 3.7% formalin solution  
557 (diluted from 37% formalin solution, Sigma-Aldrich) for 30 minutes at 4°C. Brains were washed  
558 with 0.3% PBSTx (PBS with 0.3% Triton-X) 5 times (with 15 minute shaking steps at 4°C)  
559 before primary antibody incubation. Primary antibodies were diluted in 0.3% PBSTx with 5%  
560 normal goat serum and incubation was done at 4°C overnight. Brains were washed for 5 times  
561 with 0.3% PBSTx. Secondary antibodies were diluted in 0.3% PBSTx with 5% normal goat  
562 serum and brains were incubated at 4°C overnight. Primary antibody used was mouse anti-V5  
563 (1:800 Invitrogen), Secondary antibody used was Alexa 594 anti-mouse (1:800, Invitrogen).

564 Images were taken using Nikon C2 confocal at 63x magnification and acquired at 1,024 x  
565 1,024 pixels. Analysis of BRP intensity was performed using Fiji/Imagej similarly to previously  
566 reported methods (Liu et al., 2016). First max intensity projections were created from confocal  
567 stacks of R5 ring projections. The mean intensity of the R5 ring was analyzed by subtracting the  
568 average intensity of an adjacent region (background) from the average intensity of the R5  
569 projections.

570

### 571 **Intracellular Ca<sup>2+</sup> measurements**

572 Following aging and entrainment, 4-7 day old *R69F08-Gal4 > UAS-GCaMP6s*,

573 UAS-CD4-tdTomato flies were placed in individual tubes containing sucrose-agar food (5%  
574 sucrose and 2% agar) for 3 nights. Flies were dissected day 4 and imaged in ice-cold control  
575 *Drosophila* physiological saline solution (in mM: 101 NaCl, 1 CaCl<sub>2</sub>, 4 MgCl<sub>2</sub>, 3 KCl, 5 glucose,  
576 1.25 NaH<sub>2</sub>PO<sub>4</sub>, and 20.7 NaHCO<sub>3</sub>, pH 7.2, 250 mOsm) (Flourakis et al., 2015). Brains were held  
577 ventral side down by a harp slice grid with silica fibers from ALA scientific. GCaMP and  
578 TdTomato signal in the R5 ring neuropil was measured immediately (within 5 min) after  
579 dissection at ZT1.5 and ZT9.5. Imaging experiments were performed on an Ultima two-photon  
580 laser scanning microscope (Bruker, former Prairie Technologies, Middleton, WI). Images were  
581 acquired with an upright Zeiss Axiovert microscope with a 40×0.9 numerical aperture water  
582 immersion objective at 512 pixels × 512 pixels resolution. Single optical R5 section was selected  
583 and recorded as previously described (Liu et al., 2016). In brief a single optical section was  
584 selected based on visual assessment of maximum area of tdtomato signal. The GCaMP signal  
585 was recorded at ~1 fps for 60 seconds. The average projection of the frames was used to  
586 calculate the GCaMP and TdTomato signal.

587

### 588 **Connectome analysis**

589 We accessed the NeuPrint API via R using a Natverse-based software package, *neuprintr*, along  
590 with two other open-source data visualization tools, *hemibrainr* and *ggplot2* (Bates et al., 2020) .  
591 R scripts provided by the Natverse creators were modified to generate connectivity graphs (node  
592 networks) and neuron skeletonizations (visualizations of neuronal morphology). Our modified  
593 scripts can be found at <https://rpubs.com/eogunlana0827/modified-code-for-analysis>. Most of the  
594 neurons used in this study were identified based on their annotation in Neuprint. Cry-positive



595 LNDs were identified in the total LND based on morphology according to the images in Schubert  
596 et al (Schubert et al., 2018).

597 To generate node networks for sleep pathways, the body IDs of the pre- and post-synaptic  
598 targets were determined by querying the neuron types and storing the retrieved data into two  
599 dataframes (A and B, respectively). Once A and B were determined, the shortest paths between  
600 the two types were then calculated. The code accounts for any duplicates that may arise when  
601 running *neuprintr*'s "shortest paths" function. This information is stored in another dataframe that  
602 represents each pre- and post-synaptic neuron instance in the pathway, along with their  
603 names/types and the number of synapses between each neuron. Before establishing the network  
604 environment in which the data are plotted, the newly created dataframe was modified so that  
605 only the pre- and post-synaptic neuron types and synaptic weights were included, thereby  
606 removing any body ID information. We then utilized the *network* and *ggnetwork* packages (both  
607 under the *ggplot2* package framework) to create the network environment. Colors were assigned  
608 to each neuron type using a list of variables provided in the pre-made R scripts. Finally, the  
609 connectivity graphs were plotted using *ggplot2* and exported to PDFs.

610 The *hemibrainr* package was used to generate visualizations of neuronal morphology  
611 from the EM data underlying Neuprint (*Bates et al., 2020*). For each neuron type in the sleep  
612 pathways, we collected the neuron mesh data from their NeuPrint body IDs using a *hemibrainr*  
613 function and then stored them in a variable. Then, we randomly sampled a color to assign to each  
614 neuron type using a built-in R function. The neuron mesh was then plotted in a 3D environment,  
615 and then oriented so that the anterior side of the brain was facing the viewer.

616

617 **Fluorescence Activated Cell Sorting and RNA-seq**

618 FACS/RNA-seq was performed as previously reported (Xu et al., 2019). Briefly, flies were  
619 housed in DAM system behavior boards in either control or sleep deprivation conditions.  
620 Immediately following SD, the boards were recovered from the incubators and transferred to  
621 CO<sub>2</sub> pads. Brains were dissected in ice-cold modified dissecting saline (9.9 mM HEPES-KOH  
622 buffer, 137 mM NaCl, 5.4 mM KCl, 0.17 mM NaH<sub>2</sub>PO<sub>4</sub>, 0.22 mM KH<sub>2</sub>PO<sub>4</sub>, 3.3 mM glucose,  
623 43.8 mM sucrose, pH 7.4) with 0.1 μM tetrodotoxin (TTX), 50 μM D(-)-2-amino-5-  
624 phosphonopentanoic acid (AP-5), and 20 μM 6,7-dinitroquinoxaline-2,3-dione (DNQX) to block  
625 neuronal activity. Following dissection, brains were transferred to SM<sup>Active</sup> medium (4.18 mM  
626 KH<sub>2</sub>PO<sub>4</sub>, 1.05 mM CaCl<sub>2</sub>, 0.7 mM MgSO<sub>4</sub>·7H<sub>2</sub>O, 116 mM NaCl, 8mM NaHCO<sub>3</sub>, 2 mg/ml  
627 glucose, 2 mg/ml trehalose, 0.35 mg/ml α-ketoglutaric acid, 0.06 mg/ml fumaric acid, 0.6 mg/ml  
628 malic acid, 0.06 mg/ml succinic acid, 2 mg/ml yeast extract with 20% non heat-inactivated FBS,  
629 2 mg/ml insulin and 5mM pH6.8 Bis-Tris) with 0.1 μM TTX, 50 μM AP-5, and 20 μM DNQX  
630 on ice while the rest of the brains were dissected. 40-45 brains per time point were pooled as a  
631 single sample and every condition and time point was run in triplicate for a total of twelve  
632 samples. Following dissection, the brains were pelleted by centrifugation (2000 rpm, 1 min) and  
633 washed twice with 500 uL of chilled dissecting saline (containing TTX, AP-5, and DNQX).  
634 Dissecting saline was removed and the brains were incubated at room temperature in 100 μL of  
635 papain (50 unit/mL, heat activated for 10 min at 37°C) for 30 minutes. Following digestion, the  
636 papain was inactivated with 500 μL of chilled SM<sup>Active</sup> medium and then washed twice with  
637 chilled medium on ice. The brains were triturated by pipetting with a flame-rounded 1,000 μL  
638 pipette tip (30 times with a medium opening, 30 times with a small opening). The sample was  
639 filtered using a 100 μm nylon filter (Sefar Nitex 03-100/32) then transferred to the Northwestern

640 FACS core on ice. GFP-positive cells were sorted on an Aria II FACS Cell Sorter into an  
641 extraction buffer from the Arcturus PicoPure Kit. We collected 300-550 cells per sample.  
642 Following sorting, the cells were lysed in extraction buffer by incubating at 42°C for 30 min.  
643 After lysing, the cells were stored in a -80°C freezer until libraries could be made.

644 Total RNA was extracted from collected cells using the PicoPure Kit with on-column  
645 DNase I digestion according to manufacturer instructions. Following extraction, the RNA was  
646 immediately concentrated down to 1 µL using a Speed-Vac. First strand cDNA was prepared  
647 using a T7-oligo-dT primer and SuperScript III following manufacturer instructions. Second  
648 strand synthesis was performed with DNA Polymerase (18010025), Second Strand Buffer  
649 (Cat#10812014), 10 mM dNTP (18427088), DNA Ligase (18052019), and RNaseH (18021071).  
650 The cDNA was used as a template for one round of *in vitro* transcription (IVT) using T7 RNA  
651 polymerase and the Ambion MegaScript kit according to manufacturer instructions. IVT was  
652 carried out at 37.5°C for 4 hours. Following IVT, the new RNA was purified using a Qiagen  
653 RNEasy kit and then used to generate libraries for RNA-seq using an Illumina TruSeq Stranded  
654 Kit. Libraries were checked for appropriate size distribution and purity by Bioanalyzer, then sent  
655 to Novogene for sequencing. We generated 30 million reads per sample.

656 Reads were pseudo aligned and quantified using Kallisto (v0.46.1) (Bray et al., 2016)  
657 against a prebuilt index file constructed from Ensembl reference transcriptomes (v96). Kallisto  
658 was used to process paired end reads with 10 bootstraps. Differential expression analysis of the  
659 resulting abundance estimate data was then performed with Sleuth (v0.30.0)(Pimentel et al.,  
660 2017). Gene-level abundance estimates were computed by summing transcripts per million  
661 (TPM) estimates for transcripts for each gene. To measure the effect of a particular condition

662 against another condition for a variable, sleuth uses a Wald test which generates  $p$  values as well  
663 as  $q$  values (an adjusted  $p$  value using the Benjamini-Hochberg procedure).

664

## 665 **Statistics**

666 Statistical analyses and figures were produced with Excel, Matlab and Prism. Paired student T-  
667 tests were used to compare 2 groups/time points. Repeated one and two factor ANOVA analyses  
668 were used to compare multiple time points/groups with Tukey's post hoc test. Additional details  
669 regarding tests and significance values are provided in the figure legends.

670

671

### 672 **Supplementary Video 1: Flies exhibit sleep following 2.5 hours SD terminating at ZT1.5**

673 Sped up video recording of 4.5 hours of rebound of 36 WT flies following SD from ZT23-ZT1.5.  
674 Hours post SD are indicated in red in the bottom right corner. Flies exhibit little movement  
675 throughout the 4.5 hours following SD indicating sleep.

676

### 677 **Supplementary Video 2: Flies are active following 2.5 hours SD terminating at ZT9.5**

678 Sped up video recording of 4.5 hours of rebound of 36 WT flies following SD from ZT7-ZT9.5.  
679 Hours post SD are indicated in red in the bottom right corner. After a brief period of immobility  
680 flies exhibit high activity (low sleep) preceding lights on.

681

682

683

684

685

## 686 References

- 687 An, W. F., Bowlby, M. R., Betty, M., Cao, J., Ling, H. P., Mendoza, G., Hinson, J. W., Mattsson,  
688 K. I., Strassle, B. W., Trimmer, J. S., & Rhodes, K. J. (2000). Modulation of A-type  
689 potassium channels by a family of calcium sensors. *Nature*, *403*(6769), 553-556.  
690 <https://doi.org/10.1038/35000592>
- 691 Baines, R. A., Uhler, J. P., Thompson, A., Sweeney, S. T., & Bate, M. (2001). Altered electrical  
692 properties in *Drosophila* neurons developing without synaptic transmission. *J Neurosci*,  
693 *21*(5), 1523-1531. <https://www.ncbi.nlm.nih.gov/pubmed/11222642>
- 694 Bates, A. S., Manton, J. D., Jagannathan, S. R., Costa, M., Schlegel, P., Rohlfing, T., & Jefferis,  
695 G. S. (2020). The natverse, a versatile toolbox for combining and analysing  
696 neuroanatomical data. *Elife*, *9*. <https://doi.org/10.7554/eLife.53350>
- 697 Blum, I. D., Keles, M. F., Baz, E. S., Han, E., Park, K., Luu, S., Issa, H., Brown, M., Ho, M. C.  
698 W., Tabuchi, M., Liu, S., & Wu, M. N. (2021). Astroglial Calcium Signaling Encodes  
699 Sleep Need in *Drosophila*. *Curr Biol*, *31*(1), 150-162 e157.  
700 <https://doi.org/10.1016/j.cub.2020.10.012>
- 701 Borbely, A. A. (1982). A two process model of sleep regulation. *Hum Neurobiol*, *1*(3), 195-204.  
702 <https://www.ncbi.nlm.nih.gov/pubmed/7185792>
- 703 Borbely, A. A., Daan, S., Wirz-Justice, A., & Deboer, T. (2016). The two-process model of sleep  
704 regulation: a reappraisal. *J Sleep Res*, *25*(2), 131-143. <https://doi.org/10.1111/jsr.12371>
- 705 Bray, N. L., Pimentel, H., Melsted, P., & Pachter, L. (2016). Near-optimal probabilistic RNA-seq  
706 quantification. *Nat Biotechnol*, *34*(5), 525-527. <https://doi.org/10.1038/nbt.3519>
- 707 Broadie, K., Prokop, A., Bellen, H. J., O'Kane, C. J., Schulze, K. L., & Sweeney, S. T. (1995).  
708 Syntaxin and synaptobrevin function downstream of vesicle docking in *Drosophila*.  
709 *Neuron*, *15*(3), 663-673. [https://doi.org/10.1016/0896-6273\(95\)90154-x](https://doi.org/10.1016/0896-6273(95)90154-x)
- 710 Bruning, F., Noya, S. B., Bange, T., Koutsouli, S., Rudolph, J. D., Tyagarajan, S. K., Cox, J.,  
711 Mann, M., Brown, S. A., & Robles, M. S. (2019). Sleep-wake cycles drive daily dynamics  
712 of synaptic phosphorylation. *Science*, *366*(6462).  
713 <https://doi.org/10.1126/science.aav3617>
- 714 Campbell, S. S., & Tobler, I. (1984). Animal sleep: a review of sleep duration across phylogeny.  
715 *Neurosci Biobehav Rev*, *8*(3), 269-300. [https://doi.org/10.1016/0149-7634\(84\)90054-x](https://doi.org/10.1016/0149-7634(84)90054-x)
- 716 Catterall, W. A. (2000). Structure and regulation of voltage-gated Ca<sup>2+</sup> channels. *Annu Rev Cell*  
717 *Dev Biol*, *16*, 521-555. <https://doi.org/10.1146/annurev.cellbio.16.1.521>
- 718 Cedernaes, J., Waldeck, N., & Bass, J. (2019). Neurogenetic basis for circadian regulation of  
719 metabolism by the hypothalamus. *Genes Dev*, *33*(17-18), 1136-1158.  
720 <https://doi.org/10.1101/gad.328633.119>
- 721 Chatterjee, A., Lamaze, A., De, J., Mena, W., Chelot, E., Martin, B., Hardin, P., Kadener, S.,  
722 Emery, P., & Rouyer, F. (2018). Reconfiguration of a Multi-oscillator Network by Light in  
723 the *Drosophila* Circadian Clock. *Curr Biol*, *28*(13), 2007-2017 e2004.  
724 <https://doi.org/10.1016/j.cub.2018.04.064>
- 725 Chen, T. W., Wardill, T. J., Sun, Y., Pulver, S. R., Renninger, S. L., Baohan, A., Schreiter, E. R.,  
726 Kerr, R. A., Orger, M. B., Jayaraman, V., Looger, L. L., Svoboda, K., & Kim, D. S.  
727 (2013). Ultrasensitive fluorescent proteins for imaging neuronal activity. *Nature*,  
728 *499*(7458), 295-300. <https://doi.org/10.1038/nature12354>
- 729 Chen, X., Rahman, R., Guo, F., & Rosbash, M. (2016). Genome-wide identification of neuronal  
730 activity-regulated genes in *Drosophila*. *Elife*, *5*. <https://doi.org/10.7554/eLife.19942>
- 731 Chen, Y., Akin, O., Nern, A., Tsui, C. Y., Pecot, M. Y., & Zipursky, S. L. (2014). Cell-type-  
732 specific labeling of synapses in vivo through synaptic tagging with recombination.  
733 *Neuron*, *81*(2), 280-293. <https://doi.org/10.1016/j.neuron.2013.12.021>

- 734 Chung, B. Y., Kilman, V. L., Keath, J. R., Pitman, J. L., & Allada, R. (2009). The GABA(A)  
735 receptor RDL acts in peptidergic PDF neurons to promote sleep in *Drosophila*. *Curr Biol*,  
736 *19*(5), 386-390. <https://doi.org/10.1016/j.cub.2009.01.040>
- 737 Collins, B., Pierre-Ferrer, S., Muheim, C., Lukacsovich, D., Cai, Y., Spinnler, A., Herrera, C. G.,  
738 Wen, S., Winterer, J., Belle, M. D. C., Piggins, H. D., Hastings, M., Loudon, A., Yan, J.,  
739 Foldy, C., Adamantidis, A., & Brown, S. A. (2020). Circadian VIPergic Neurons of the  
740 Suprachiasmatic Nuclei Sculpt the Sleep-Wake Cycle. *Neuron*, *108*(3), 486-499 e485.  
741 <https://doi.org/10.1016/j.neuron.2020.08.001>
- 742 Deboer, T., & Tobler, I. (2000). Slow waves in the sleep electroencephalogram after daily torpor  
743 are homeostatically regulated. *Neuroreport*, *11*(4), 881-885.  
744 <https://doi.org/10.1097/00001756-200003200-00044>
- 745 Dijk, D. J., & Czeisler, C. A. (1994). Paradoxical timing of the circadian rhythm of sleep  
746 propensity serves to consolidate sleep and wakefulness in humans. *Neurosci Lett*,  
747 *166*(1), 63-68. [https://doi.org/10.1016/0304-3940\(94\)90841-9](https://doi.org/10.1016/0304-3940(94)90841-9)
- 748 Dijk, D. J., & Czeisler, C. A. (1995). Contribution of the circadian pacemaker and the sleep  
749 homeostat to sleep propensity, sleep structure, electroencephalographic slow waves,  
750 and sleep spindle activity in humans. *J Neurosci*, *15*(5 Pt 1), 3526-3538.  
751 <https://www.ncbi.nlm.nih.gov/pubmed/7751928>
- 752 Dijk, D. J., & Duffy, J. F. (1999). Circadian regulation of human sleep and age-related changes  
753 in its timing, consolidation and EEG characteristics. *Ann Med*, *31*(2), 130-140.  
754 <https://doi.org/10.3109/07853899908998789>
- 755 Dionne, H., Hibbard, K. L., Cavallaro, A., Kao, J. C., & Rubin, G. M. (2018). Genetic Reagents  
756 for Making Split-GAL4 Lines in *Drosophila*. *Genetics*, *209*(1), 31-35.  
757 <https://doi.org/10.1534/genetics.118.300682>
- 758 Donlea, J. M., Pimentel, D., & Miesenbock, G. (2014). Neuronal machinery of sleep  
759 homeostasis in *Drosophila*. *Neuron*, *81*(4), 860-872.  
760 <https://doi.org/10.1016/j.neuron.2013.12.013>
- 761 Donlea, J. M., Thimman, M. S., Suzuki, Y., Gottschalk, L., & Shaw, P. J. (2011). Inducing sleep  
762 by remote control facilitates memory consolidation in *Drosophila*. *Science*, *332*(6037),  
763 1571-1576. <https://doi.org/10.1126/science.1202249>
- 764 Dubowy, C., & Sehgal, A. (2017). Circadian Rhythms and Sleep in *Drosophila melanogaster*.  
765 *Genetics*, *205*(4), 1373-1397. <https://doi.org/10.1534/genetics.115.185157>
- 766 Easton, A., Meerlo, P., Bergmann, B., & Turek, F. W. (2004). The suprachiasmatic nucleus  
767 regulates sleep timing and amount in mice. *Sleep*, *27*(7), 1307-1318.  
768 <https://doi.org/10.1093/sleep/27.7.1307>
- 769 Fernandez, F., Lu, D., Ha, P., Costacurta, P., Chavez, R., Heller, H. C., & Ruby, N. F. (2014).  
770 Circadian rhythm. Dysrhythmia in the suprachiasmatic nucleus inhibits memory  
771 processing. *Science*, *346*(6211), 854-857. <https://doi.org/10.1126/science.1259652>
- 772 Fernandez, R. W., Nurilov, M., Feliciano, O., McDonald, I. S., & Simon, A. F. (2014).  
773 Straightforward assay for quantification of social avoidance in *Drosophila melanogaster*.  
774 *J Vis Exp*(94). <https://doi.org/10.3791/52011>
- 775 Flourakis, M., Kula-Eversole, E., Hutchison, A. L., Han, T. H., Aranda, K., Moose, D. L., White,  
776 K. P., Dinner, A. R., Lear, B. C., Ren, D., Diekmann, C. O., Raman, I. M., & Allada, R.  
777 (2015). A Conserved Bicycle Model for Circadian Clock Control of Membrane  
778 Excitability. *Cell*, *162*(4), 836-848. <https://doi.org/10.1016/j.cell.2015.07.036>
- 779 Franken, P., Dijk, D. J., Tobler, I., & Borbely, A. A. (1991). Sleep deprivation in rats: effects on  
780 EEG power spectra, vigilance states, and cortical temperature. *Am J Physiol*, *261*(1 Pt  
781 2), R198-208. <https://doi.org/10.1152/ajpregu.1991.261.1.R198>
- 782 Franken, P., Dudley, C. A., Estill, S. J., Barakat, M., Thomason, R., O'Hara, B. F., & McKnight,  
783 S. L. (2006). NPAS2 as a transcriptional regulator of non-rapid eye movement sleep:



- 784 genotype and sex interactions. *Proc Natl Acad Sci U S A*, 103(18), 7118-7123.  
785 <https://doi.org/10.1073/pnas.0602006103>
- 786 Gilestro, G. F., Tononi, G., & Cirelli, C. (2009). Widespread changes in synaptic markers as a  
787 function of sleep and wakefulness in *Drosophila*. *Science*, 324(5923), 109-112.  
788 <https://doi.org/10.1126/science.1166673>
- 789 Grima, B., Chelot, E., Xia, R., & Rouyer, F. (2004). Morning and evening peaks of activity rely  
790 on different clock neurons of the *Drosophila* brain. *Nature*, 431(7010), 869-873.  
791 <https://doi.org/10.1038/nature02935>
- 792 Guo, F., Cerullo, I., Chen, X., & Rosbash, M. (2014). PDF neuron firing phase-shifts key  
793 circadian activity neurons in *Drosophila*. *Elife*, 3. <https://doi.org/10.7554/eLife.02780>
- 794 Guo, F., Chen, X., & Rosbash, M. (2017). Temporal calcium profiling of specific circadian  
795 neurons in freely moving flies. *Proc Natl Acad Sci U S A*, 114(41), E8780-E8787.  
796 <https://doi.org/10.1073/pnas.1706608114>
- 797 Guo, F., Holla, M., Diaz, M. M., & Rosbash, M. (2018). A Circadian Output Circuit Controls  
798 Sleep-Wake Arousal in *Drosophila*. *Neuron*, 100(3), 624-635 e624.  
799 <https://doi.org/10.1016/j.neuron.2018.09.002>
- 800 Guo, F., Yu, J., Jung, H. J., Abruzzi, K. C., Luo, W., Griffith, L. C., & Rosbash, M. (2016).  
801 Circadian neuron feedback controls the *Drosophila* sleep--activity profile. *Nature*,  
802 536(7616), 292-297. <https://doi.org/10.1038/nature19097>
- 803 Hamblencoyle, M. J., Wheeler, D. A., Rutila, J. E., Rosbash, M., & Hall, J. C. (1992). Behavior  
804 of Period-Altered Circadian-Rhythm Mutants of *Drosophila* in Light - Dark Cycles  
805 (Diptera, Drosophilidae). *Journal of Insect Behavior*, 5(4), 417-446. <https://doi.org/10.1007/Bf01058189>
- 806
- 807 Haug-Collet, K., Pearson, B., Webel, R., Szerencsei, R. T., Winkfein, R. J., Schnetkamp, P. P.,  
808 & Colley, N. J. (1999). Cloning and characterization of a potassium-dependent  
809 sodium/calcium exchanger in *Drosophila*. *J Cell Biol*, 147(3), 659-670.  
810 <https://doi.org/10.1083/jcb.147.3.659>
- 811 Hendricks, J. C., Finn, S. M., Panckeri, K. A., Chavkin, J., Williams, J. A., Sehgal, A., & Pack, A.  
812 I. (2000). Rest in *Drosophila* is a sleep-like state. *Neuron*, 25(1), 129-138.  
813 [https://doi.org/10.1016/s0896-6273\(00\)80877-6](https://doi.org/10.1016/s0896-6273(00)80877-6)
- 814 Huang, S., Piao, C., Beuschel, C. B., Gotz, T., & Sigrist, S. J. (2020). Presynaptic Active Zone  
815 Plasticity Encodes Sleep Need in *Drosophila*. *Curr Biol*, 30(6), 1077-1091 e1075.  
816 <https://doi.org/10.1016/j.cub.2020.01.019>
- 817 Huber, R., Hill, S. L., Holladay, C., Biesiadecki, M., Tononi, G., & Cirelli, C. (2004). Sleep  
818 homeostasis in *Drosophila melanogaster*. *Sleep*, 27(4), 628-639.  
819 <https://doi.org/10.1093/sleep/27.4.628>
- 820 Isaac, R. E., Li, C., Leedale, A. E., & Shirras, A. D. (2010). *Drosophila* male sex peptide inhibits  
821 siesta sleep and promotes locomotor activity in the post-mated female. *Proc Biol Sci*,  
822 277(1678), 65-70. <https://doi.org/10.1098/rspb.2009.1236>
- 823 Iyer, E. P., Iyer, S. C., Sullivan, L., Wang, D., Meduri, R., Graybeal, L. L., & Cox, D. N. (2013).  
824 Functional genomic analyses of two morphologically distinct classes of *Drosophila*  
825 sensory neurons: post-mitotic roles of transcription factors in dendritic patterning. *PLoS*  
826 *One*, 8(8), e72434. <https://doi.org/10.1371/journal.pone.0072434>
- 827 Jenett, A., Rubin, G. M., Ngo, T. T., Shepherd, D., Murphy, C., Dionne, H., Pfeiffer, B. D.,  
828 Cavallaro, A., Hall, D., Jeter, J., Iyer, N., Fetter, D., Hausenfluck, J. H., Peng, H.,  
829 Trautman, E. T., Svirskaas, R. R., Myers, E. W., Iwinski, Z. R., Aso, Y., DePasquale, G.  
830 M., Enos, A., Hulamm, P., Lam, S. C., Li, H. H., Lavery, T. R., Long, F., Qu, L., Murphy,  
831 S. D., Rokicki, K., Safford, T., Shaw, K., Simpson, J. H., Sowell, A., Tae, S., Yu, Y., &  
832 Zugates, C. T. (2012). A GAL4-driver line resource for *Drosophila* neurobiology. *Cell*  
833 *Rep*, 2(4), 991-1001. <https://doi.org/10.1016/j.celrep.2012.09.011>

- 834 Johnson, E. L., 3rd, Fetter, R. D., & Davis, G. W. (2009). Negative regulation of active zone  
835 assembly by a newly identified SR protein kinase. *PLoS Biol*, 7(9), e1000193.  
836 <https://doi.org/10.1371/journal.pbio.1000193>
- 837 Kayser, M. S., Yue, Z., & Sehgal, A. (2014). A critical period of sleep for development of  
838 courtship circuitry and behavior in *Drosophila*. *Science*, 344(6181), 269-274.  
839 <https://doi.org/10.1126/science.1250553>
- 840 Klarsfeld, A., Malpel, S., Michard-Vanhee, C., Picot, M., Chelot, E., & Rouyer, F. (2004). Novel  
841 features of cryptochrome-mediated photoreception in the brain circadian clock of  
842 *Drosophila*. *J Neurosci*, 24(6), 1468-1477. [https://doi.org/10.1523/JNEUROSCI.3661-](https://doi.org/10.1523/JNEUROSCI.3661-03.2004)  
843 [03.2004](https://doi.org/10.1523/JNEUROSCI.3661-03.2004)
- 844 Konopka, R. J., & Benzer, S. (1971). Clock mutants of *Drosophila melanogaster*. *Proc Natl Acad*  
845 *Sci U S A*, 68(9), 2112-2116. <https://doi.org/10.1073/pnas.68.9.2112>
- 846 Kunst, M., Hughes, M. E., Raccuglia, D., Felix, M., Li, M., Barnett, G., Duah, J., & Nitabach, M.  
847 N. (2014). Calcitonin gene-related peptide neurons mediate sleep-specific circadian  
848 output in *Drosophila*. *Curr Biol*, 24(22), 2652-2664.  
849 <https://doi.org/10.1016/j.cub.2014.09.077>
- 850 Lamaze, A., Kratschmer, P., Chen, K. F., Lowe, S., & Jepson, J. E. C. (2018). A Wake-  
851 Promoting Circadian Output Circuit in *Drosophila*. *Curr Biol*, 28(19), 3098-3105 e3093.  
852 <https://doi.org/10.1016/j.cub.2018.07.024>
- 853 Laposky, A., Easton, A., Dugovic, C., Walisser, J., Bradfield, C., & Turek, F. (2005). Deletion of  
854 the mammalian circadian clock gene BMAL1/Mop3 alters baseline sleep architecture  
855 and the response to sleep deprivation. *Sleep*, 28(4), 395-409.  
856 <https://doi.org/10.1093/sleep/28.4.395>
- 857 Lazar, A. S., Lazar, Z. I., & Dijk, D. J. (2015). Circadian regulation of slow waves in human  
858 sleep: Topographical aspects. *Neuroimage*, 116, 123-134.  
859 <https://doi.org/10.1016/j.neuroimage.2015.05.012>
- 860 Lee, E., Jeong, E. H., Jeong, H. J., Yildirim, E., Vanselow, J. T., Ng, F., Liu, Y., Mahesh, G.,  
861 Kramer, A., Hardin, P. E., Edery, I., & Kim, E. Y. (2014). Phosphorylation of a central  
862 clock transcription factor is required for thermal but not photic entrainment. *PLoS Genet*,  
863 10(8), e1004545. <https://doi.org/10.1371/journal.pgen.1004545>
- 864 Lee, P. T., Lin, G., Lin, W. W., Diao, F., White, B. H., & Bellen, H. J. (2018). A kinase-dependent  
865 feedforward loop affects CREBB stability and long term memory formation. *Elife*, 7.  
866 <https://doi.org/10.7554/eLife.33007>
- 867 Liang, X., Ho, M. C. W., Zhang, Y., Li, Y., Wu, M. N., Holy, T. E., & Taghert, P. H. (2019).  
868 Morning and Evening Circadian Pacemakers Independently Drive Premotor Centers via  
869 a Specific Dopamine Relay. *Neuron*, 102(4), 843-857 e844.  
870 <https://doi.org/10.1016/j.neuron.2019.03.028>
- 871 Liang, X., Holy, T. E., & Taghert, P. H. (2017). A Series of Suppressive Signals within the  
872 *Drosophila* Circadian Neural Circuit Generates Sequential Daily Outputs. *Neuron*, 94(6),  
873 1173-1189 e1174. <https://doi.org/10.1016/j.neuron.2017.05.007>
- 874 Liu, S., Liu, Q., Tabuchi, M., & Wu, M. N. (2016). Sleep Drive Is Encoded by Neural Plastic  
875 Changes in a Dedicated Circuit. *Cell*, 165(6), 1347-1360.  
876 <https://doi.org/10.1016/j.cell.2016.04.013>
- 877 Loughney, K., Kreber, R., & Ganetzky, B. (1989). Molecular analysis of the para locus, a sodium  
878 channel gene in *Drosophila*. *Cell*, 58(6), 1143-1154. [https://doi.org/10.1016/0092-](https://doi.org/10.1016/0092-8674(89)90512-6)  
879 [8674\(89\)90512-6](https://doi.org/10.1016/0092-8674(89)90512-6)
- 880 Lovick, J. K., Omoto, J. J., Ngo, K. T., & Hartenstein, V. (2017). Development of the anterior  
881 visual input pathway to the *Drosophila* central complex. *J Comp Neurol*, 525(16), 3458-  
882 3475. <https://doi.org/10.1002/cne.24277>
- 883 Matkovic, T., Siebert, M., Knoche, E., Depner, H., Mertel, S., Oswald, D., Schmidt, M., Thomas,  
884 U., Sickmann, A., Kamin, D., Hell, S. W., Burger, J., Hollmann, C., Mielke, T.,



- 885 Wichmann, C., & Sigrist, S. J. (2013). The Bruchpilot cytomatrix determines the size of  
886 the readily releasable pool of synaptic vesicles. *J Cell Biol*, 202(4), 667-683.  
887 <https://doi.org/10.1083/jcb.201301072>
- 888 McDonald, M. J., & Rosbash, M. (2001). Microarray analysis and organization of circadian gene  
889 expression in *Drosophila*. *Cell*, 107(5), 567-578. <https://doi.org/10.1016/s0092->  
890 8674(01)00545-1
- 891 Miyasako, Y., Umezaki, Y., & Tomioka, K. (2007). Separate sets of cerebral clock neurons are  
892 responsible for light and temperature entrainment of *Drosophila* circadian locomotor  
893 rhythms. *J Biol Rhythms*, 22(2), 115-126. <https://doi.org/10.1177/0748730407299344>
- 894 Muller, M., Liu, K. S., Sigrist, S. J., & Davis, G. W. (2012). RIM controls homeostatic plasticity  
895 through modulation of the readily-releasable vesicle pool. *J Neurosci*, 32(47), 16574-  
896 16585. <https://doi.org/10.1523/JNEUROSCI.0981-12.2012>
- 897 Nall, A. H., & Sehgal, A. (2013). Small-molecule screen in adult *Drosophila* identifies VMAT as a  
898 regulator of sleep. *J Neurosci*, 33(19), 8534-8540.  
899 <https://doi.org/10.1523/JNEUROSCI.0253-13.2013>
- 900 Ni, J. D., Gurav, A. S., Liu, W., Ogunmowo, T. H., Hackbart, H., Elsheikh, A., Verdegaal, A. A.,  
901 & Montell, C. (2019). Differential regulation of the *Drosophila* sleep homeostat by  
902 circadian and arousal inputs. *Elife*, 8. <https://doi.org/10.7554/eLife.40487>
- 903 Nieratschker, V., Schubert, A., Jauch, M., Bock, N., Bucher, D., Dippacher, S., Krohne, G.,  
904 Asan, E., Buchner, S., & Buchner, E. (2009). Bruchpilot in ribbon-like axonal  
905 agglomerates, behavioral defects, and early death in SRPK79D kinase mutants of  
906 *Drosophila*. *PLoS Genet*, 5(10), e1000700. <https://doi.org/10.1371/journal.pgen.1000700>
- 907 Noya, S. B., Colameo, D., Bruning, F., Spinnler, A., Mircsof, D., Opitz, L., Mann, M., Tyagarajan,  
908 S. K., Robles, M. S., & Brown, S. A. (2019). The forebrain synaptic transcriptome is  
909 organized by clocks but its proteome is driven by sleep. *Science*, 366(6462).  
910 <https://doi.org/10.1126/science.aav2642>
- 911 Oh, Y., Yoon, S. E., Zhang, Q., Chae, H. S., Daubnerova, I., Shafer, O. T., Choe, J., & Kim, Y.  
912 J. (2014). A homeostatic sleep-stabilizing pathway in *Drosophila* composed of the sex  
913 peptide receptor and its ligand, the myoinhibitory peptide. *PLoS Biol*, 12(10), e1001974.  
914 <https://doi.org/10.1371/journal.pbio.1001974>
- 915 Omoto, J. J., Keles, M. F., Nguyen, B. M., Bolanos, C., Lovick, J. K., Frye, M. A., & Hartenstein,  
916 V. (2017). Visual Input to the *Drosophila* Central Complex by Developmentally and  
917 Functionally Distinct Neuronal Populations. *Curr Biol*, 27(8), 1098-1110.  
918 <https://doi.org/10.1016/j.cub.2017.02.063>
- 919 Parisky, K. M., Agosto, J., Pulver, S. R., Shang, Y., Kuklin, E., Hodge, J. J., Kang, K., Liu, X.,  
920 Garrity, P. A., Rosbash, M., & Griffith, L. C. (2008). PDF cells are a GABA-responsive  
921 wake-promoting component of the *Drosophila* sleep circuit. *Neuron*, 60(4), 672-682.  
922 <https://doi.org/10.1016/j.neuron.2008.10.042>
- 923 Patke, A., Young, M. W., & Axelrod, S. (2020). Molecular mechanisms and physiological  
924 importance of circadian rhythms. *Nat Rev Mol Cell Biol*, 21(2), 67-84.  
925 <https://doi.org/10.1038/s41580-019-0179-2>
- 926 Pfeiffenberger, C., & Allada, R. (2012). Cul3 and the BTB adaptor insomniac are key regulators  
927 of sleep homeostasis and a dopamine arousal pathway in *Drosophila*. *PLoS Genet*,  
928 8(10), e1003003. <https://doi.org/10.1371/journal.pgen.1003003>
- 929 Pfeiffenberger, C., Lear, B. C., Keegan, K. P., & Allada, R. (2010a). Processing circadian data  
930 collected from the *Drosophila* Activity Monitoring (DAM) System. *Cold Spring Harb*  
931 *Protoc*, 2010(11), pdb prot5519. <https://doi.org/10.1101/pdb.prot5519>
- 932 Pfeiffenberger, C., Lear, B. C., Keegan, K. P., & Allada, R. (2010b). Processing sleep data  
933 created with the *Drosophila* Activity Monitoring (DAM) System. *Cold Spring Harb Protoc*,  
934 2010(11), pdb prot5520. <https://doi.org/10.1101/pdb.prot5520>

- 935 Pfeiffer, B. D., Jenett, A., Hammonds, A. S., Ngo, T. T., Misra, S., Murphy, C., Scully, A.,  
936 Carlson, J. W., Wan, K. H., Laverty, T. R., Mungall, C., Svirskas, R., Kadonaga, J. T.,  
937 Doe, C. Q., Eisen, M. B., Celniker, S. E., & Rubin, G. M. (2008). Tools for neuroanatomy  
938 and neurogenetics in *Drosophila*. *Proc Natl Acad Sci U S A*, *105*(28), 9715-9720.  
939 <https://doi.org/10.1073/pnas.0803697105>
- 940 Picot, M., Cusumano, P., Klarsfeld, A., Ueda, R., & Rouyer, F. (2007). Light activates output  
941 from evening neurons and inhibits output from morning neurons in the *Drosophila*  
942 circadian clock. *PLoS Biol*, *5*(11), e315. <https://doi.org/10.1371/journal.pbio.0050315>
- 943 Pimentel, H., Bray, N. L., Puente, S., Melsted, P., & Pachter, L. (2017). Differential analysis of  
944 RNA-seq incorporating quantification uncertainty. *Nat Methods*, *14*(7), 687-690.  
945 <https://doi.org/10.1038/nmeth.4324>
- 946 Qian, Y., Cao, Y., Deng, B., Yang, G., Li, J., Xu, R., Zhang, D., Huang, J., & Rao, Y. (2017).  
947 Sleep homeostasis regulated by 5HT2b receptor in a small subset of neurons in the  
948 dorsal fan-shaped body of *Drosophila*. *Elife*, *6*. <https://doi.org/10.7554/eLife.26519>
- 949 Raccuglia, D., Huang, S., Ender, A., Heim, M. M., Laber, D., Suarez-Grimalt, R., Liotta, A.,  
950 Sigrist, S. J., Geiger, J. R. P., & Oswald, D. (2019). Network-Specific Synchronization of  
951 Electrical Slow-Wave Oscillations Regulates Sleep Drive in *Drosophila*. *Curr Biol*,  
952 *29*(21), 3611-3621 e3613. <https://doi.org/10.1016/j.cub.2019.08.070>
- 953 Scheffer, L. K., Xu, C. S., Januszewski, M., Lu, Z., Takemura, S. Y., Hayworth, K. J., Huang, G.  
954 B., Shinomiya, K., Maitlin-Shepard, J., Berg, S., Clements, J., Hubbard, P. M., Katz, W.  
955 T., Umayam, L., Zhao, T., Ackerman, D., Blakely, T., Bogovic, J., Dolafi, T., Kainmueller,  
956 D., Kawase, T., Khairy, K. A., Leavitt, L., Li, P. H., Lindsey, L., Neubarth, N., Olbris, D.  
957 J., Otsuna, H., Trautman, E. T., Ito, M., Bates, A. S., Goldammer, J., Wolff, T., Svirskas,  
958 R., Schlegel, P., Neace, E., Knecht, C. J., Alvarado, C. X., Bailey, D. A., Ballinger, S.,  
959 Borycz, J. A., Canino, B. S., Cheatham, N., Cook, M., Dreher, M., Duclos, O., Eubanks,  
960 B., Fairbanks, K., Finley, S., Forknall, N., Francis, A., Hopkins, G. P., Joyce, E. M., Kim,  
961 S., Kirk, N. A., Kovalyak, J., Lauchie, S. A., Lohff, A., Maldonado, C., Manley, E. A.,  
962 McLin, S., Mooney, C., Ndama, M., Ogundeyi, O., Okeoma, N., Ordish, C., Padilla, N.,  
963 Patrick, C. M., Paterson, T., Phillips, E. E., Phillips, E. M., Rampally, N., Ribeiro, C.,  
964 Robertson, M. K., Rymer, J. T., Ryan, S. M., Sammons, M., Scott, A. K., Scott, A. L.,  
965 Shinomiya, A., Smith, C., Smith, K., Smith, N. L., Sobeski, M. A., Suleiman, A., Swift, J.,  
966 Takemura, S., Talebi, I., Tarnogorska, D., Tenshaw, E., Tokhi, T., Walsh, J. J., Yang, T.,  
967 Horne, J. A., Li, F., Parekh, R., Rivlin, P. K., Jayaraman, V., Costa, M., Jefferis, G. S.,  
968 Ito, K., Saalfeld, S., George, R., Meinertzhagen, I. A., Rubin, G. M., Hess, H. F., Jain, V.,  
969 & Plaza, S. M. (2020). A connectome and analysis of the adult *Drosophila* central brain.  
970 *Elife*, *9*. <https://doi.org/10.7554/eLife.57443>
- 971 Schubert, F. K., Hagedorn, N., Yoshii, T., Helfrich-Forster, C., & Rieger, D. (2018).  
972 Neuroanatomical details of the lateral neurons of *Drosophila melanogaster* support their  
973 functional role in the circadian system. *J Comp Neurol*, *526*(7), 1209-1231.  
974 <https://doi.org/10.1002/cne.24406>
- 975 Shafer, O. T., & Keene, A. C. (2021). The Regulation of *Drosophila* Sleep. *Curr Biol*, *31*(1), R38-  
976 R49. <https://doi.org/10.1016/j.cub.2020.10.082>
- 977 Shaw, P. J., Cirelli, C., Greenspan, R. J., & Tononi, G. (2000). Correlates of sleep and waking in  
978 *Drosophila melanogaster*. *Science*, *287*(5459), 1834-1837.  
979 <https://doi.org/10.1126/science.287.5459.1834>
- 980 Shaw, P. J., Tononi, G., Greenspan, R. J., & Robinson, D. F. (2002). Stress response genes  
981 protect against lethal effects of sleep deprivation in *Drosophila*. *Nature*, *417*(6886), 287-  
982 291. <https://doi.org/10.1038/417287a>
- 983 Sheeba, V., Fogle, K. J., Kaneko, M., Rashid, S., Chou, Y. T., Sharma, V. K., & Holmes, T. C.  
984 (2008). Large ventral lateral neurons modulate arousal and sleep in *Drosophila*. *Curr*  
985 *Biol*, *18*(20), 1537-1545. <https://doi.org/10.1016/j.cub.2008.08.033>

- 986 Stoleru, D., Peng, Y., Agosto, J., & Rosbash, M. (2004). Coupled oscillators control morning and  
987 evening locomotor behaviour of *Drosophila*. *Nature*, *431*(7010), 862-868.  
988 <https://doi.org/10.1038/nature02926>
- 989 Sweeney, S. T., Broadie, K., Keane, J., Niemann, H., & O'Kane, C. J. (1995). Targeted  
990 expression of tetanus toxin light chain in *Drosophila* specifically eliminates synaptic  
991 transmission and causes behavioral defects. *Neuron*, *14*(2), 341-351.  
992 [https://doi.org/10.1016/0896-6273\(95\)90290-2](https://doi.org/10.1016/0896-6273(95)90290-2)
- 993 Tobler, I., Borbely, A. A., & Groos, G. (1983). The effect of sleep deprivation on sleep in rats  
994 with suprachiasmatic lesions. *Neurosci Lett*, *42*(1), 49-54. [https://doi.org/10.1016/0304-3940\(83\)90420-2](https://doi.org/10.1016/0304-3940(83)90420-2)
- 995  
996 Tononi, G., & Cirelli, C. (2014). Sleep and the price of plasticity: from synaptic and cellular  
997 homeostasis to memory consolidation and integration. *Neuron*, *81*(1), 12-34.  
998 <https://doi.org/10.1016/j.neuron.2013.12.025>
- 999 Vaccaro, A., Kaplan Dor, Y., Nambara, K., Pollina, E. A., Lin, C., Greenberg, M. E., & Rogulja,  
1000 D. (2020). Sleep Loss Can Cause Death through Accumulation of Reactive Oxygen  
1001 Species in the Gut. *Cell*, *181*(6), 1307-1328 e1315.  
1002 <https://doi.org/10.1016/j.cell.2020.04.049>
- 1003 van Alphen, B., Yap, M. H., Kirszenblat, L., Kottler, B., & van Swinderen, B. (2013). A dynamic  
1004 deep sleep stage in *Drosophila*. *J Neurosci*, *33*(16), 6917-6927.  
1005 <https://doi.org/10.1523/JNEUROSCI.0061-13.2013>
- 1006 Werth, E., Dijk, D. J., Achermann, P., & Borbely, A. A. (1996). Dynamics of the sleep EEG after  
1007 an early evening nap: experimental data and simulations. *Am J Physiol*, *271*(3 Pt 2),  
1008 R501-510. <https://doi.org/10.1152/ajpregu.1996.271.3.R501>
- 1009 Wisor, J. P., O'Hara, B. F., Terao, A., Selby, C. P., Kilduff, T. S., Sancar, A., Edgar, D. M., &  
1010 Franken, P. (2002). A role for cryptochromes in sleep regulation. *BMC Neurosci*, *3*, 20.  
1011 <https://doi.org/10.1186/1471-2202-3-20>
- 1012 Xu, F., Kula-Eversole, E., Iwanaszko, M., Hutchison, A. L., Dinner, A., & Allada, R. (2019).  
1013 Circadian Clocks Function in Concert with Heat Shock Organizing Protein to Modulate  
1014 Mutant Huntingtin Aggregation and Toxicity. *Cell Rep*, *27*(1), 59-70 e54.  
1015 <https://doi.org/10.1016/j.celrep.2019.03.015>
- 1016 Yin, J. C., Del Vecchio, M., Zhou, H., & Tully, T. (1995). CREB as a memory modulator: induced  
1017 expression of a dCREB2 activator isoform enhances long-term memory in *Drosophila*.  
1018 *Cell*, *81*(1), 107-115. [https://doi.org/10.1016/0092-8674\(95\)90375-5](https://doi.org/10.1016/0092-8674(95)90375-5)
- 1019 Zhang, L., Chung, B. Y., Lear, B. C., Kilman, V. L., Liu, Y., Mahesh, G., Meissner, R. A., Hardin,  
1020 P. E., & Allada, R. (2010). DN1(p) circadian neurons coordinate acute light and PDF  
1021 inputs to produce robust daily behavior in *Drosophila*. *Curr Biol*, *20*(7), 591-599.  
1022 <https://doi.org/10.1016/j.cub.2010.02.056>
- 1023 Zhang, Y., Liu, Y., Bilodeau-Wentworth, D., Hardin, P. E., & Emery, P. (2010). Light and  
1024 temperature control the contribution of specific DN1 neurons to *Drosophila* circadian  
1025 behavior. *Curr Biol*, *20*(7), 600-605. <https://doi.org/10.1016/j.cub.2010.02.044>
- 1026 Zhang, Y. V., Hannan, S. B., Kern, J. V., Stanchev, D. T., Koc, B., Jahn, T. R., & Rasse, T. M.  
1027 (2017). The KIF1A homolog Unc-104 is important for spontaneous release, postsynaptic  
1028 density maturation and perisynaptic scaffold organization. *Sci Rep*, *7*, 38172.  
1029 <https://doi.org/10.1038/srep38172>

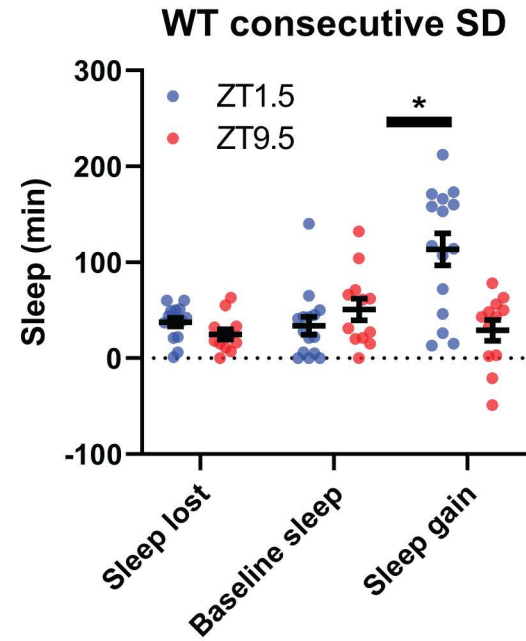

**Supplemental Figure 1: WT flies exhibit higher rebound in the morning than the evening even using abridged protocol**

Comparison of sleep lost, baseline sleep, and sleep gain at morning(ZT1.5) and evening (ZT9.5) time points using abridged protocol with WT flies. Sleep gain is greater for WT (N=18) at ZT1.5 compared to ZT9.5 ( $P < .001$ , paired t-test ).



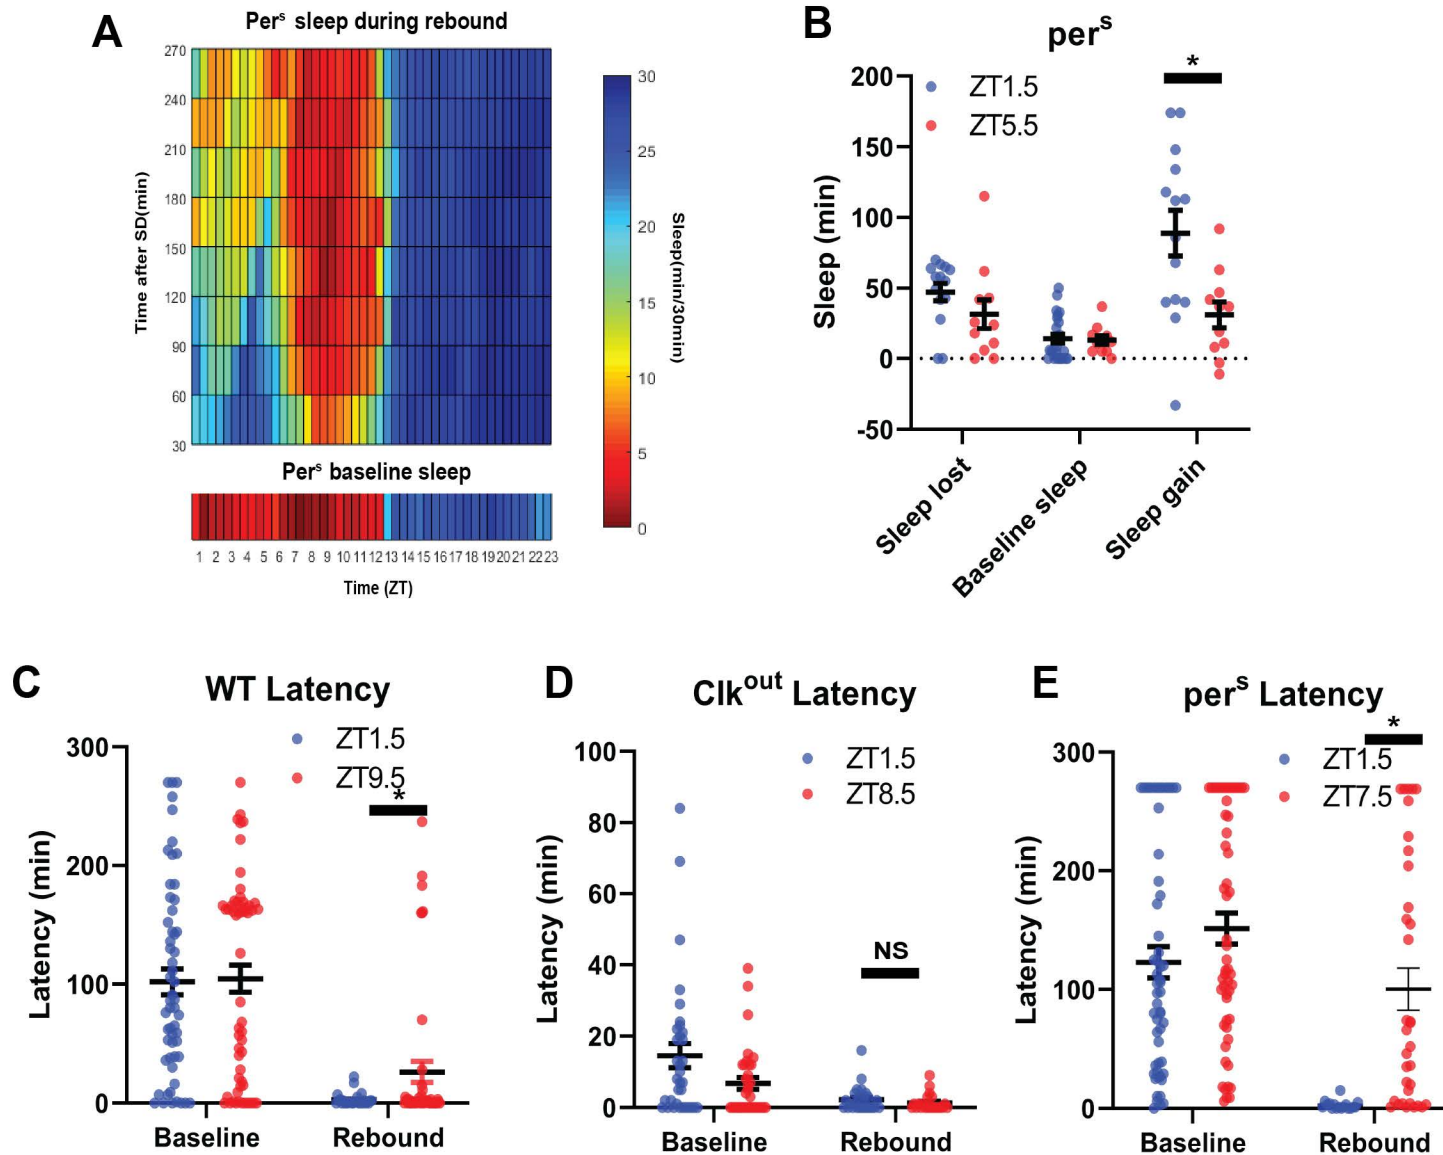

### Supplemental Figure 2: Total sleep and sleep latency vary as a function of time and SD

(A) Rebound sleep heatmap (above) illustrates average sleep as a function of time of day when rebound occurred (ZT) and minutes after FD episode. Missing time points are filled using matlab linear interpolation function. Baseline sleep heatmaps (below) illustrate average sleep during 30 min bins. per<sup>S</sup> (N=45) baseline sleep displays low sleep following lights on and preceding lights off. Immediately following SD flies show increased sleep except in the hours preceding lights off. Flies tend to sleep less as rebound time proceeds. (B) FD sleep during two baseline time periods (sleep lost and baseline sleep) and sleep gain for rebound occurring at ZT1.5 and ZT5.5. Sleep gain is greater for per<sup>S</sup> (N=45) rebound at ZT1.5 compared to ZT5.5 ( $P < .01$ , paired t-test).

(C,D,E) Morning and evening sleep latency at baseline and following deprivation for WT and circadian mutant flies. Morning times are matched with evening time points with similar baseline latency.

(A) Following SD, WT (N=32) sleep latency is greater in the evening compared to matched morning time point ( $P < .05$ , paired t-test).

(B) No difference in sleep latency following SD between matched morning/evening time points in Clk<sup>out</sup> (N=40) ( $P > 0.50$ , paired t-test).

(D) Following SD, per<sup>S</sup> (N=45) sleep latency is greater in the evening compared to matched morning time point ( $P < .0001$ , paired t-test).

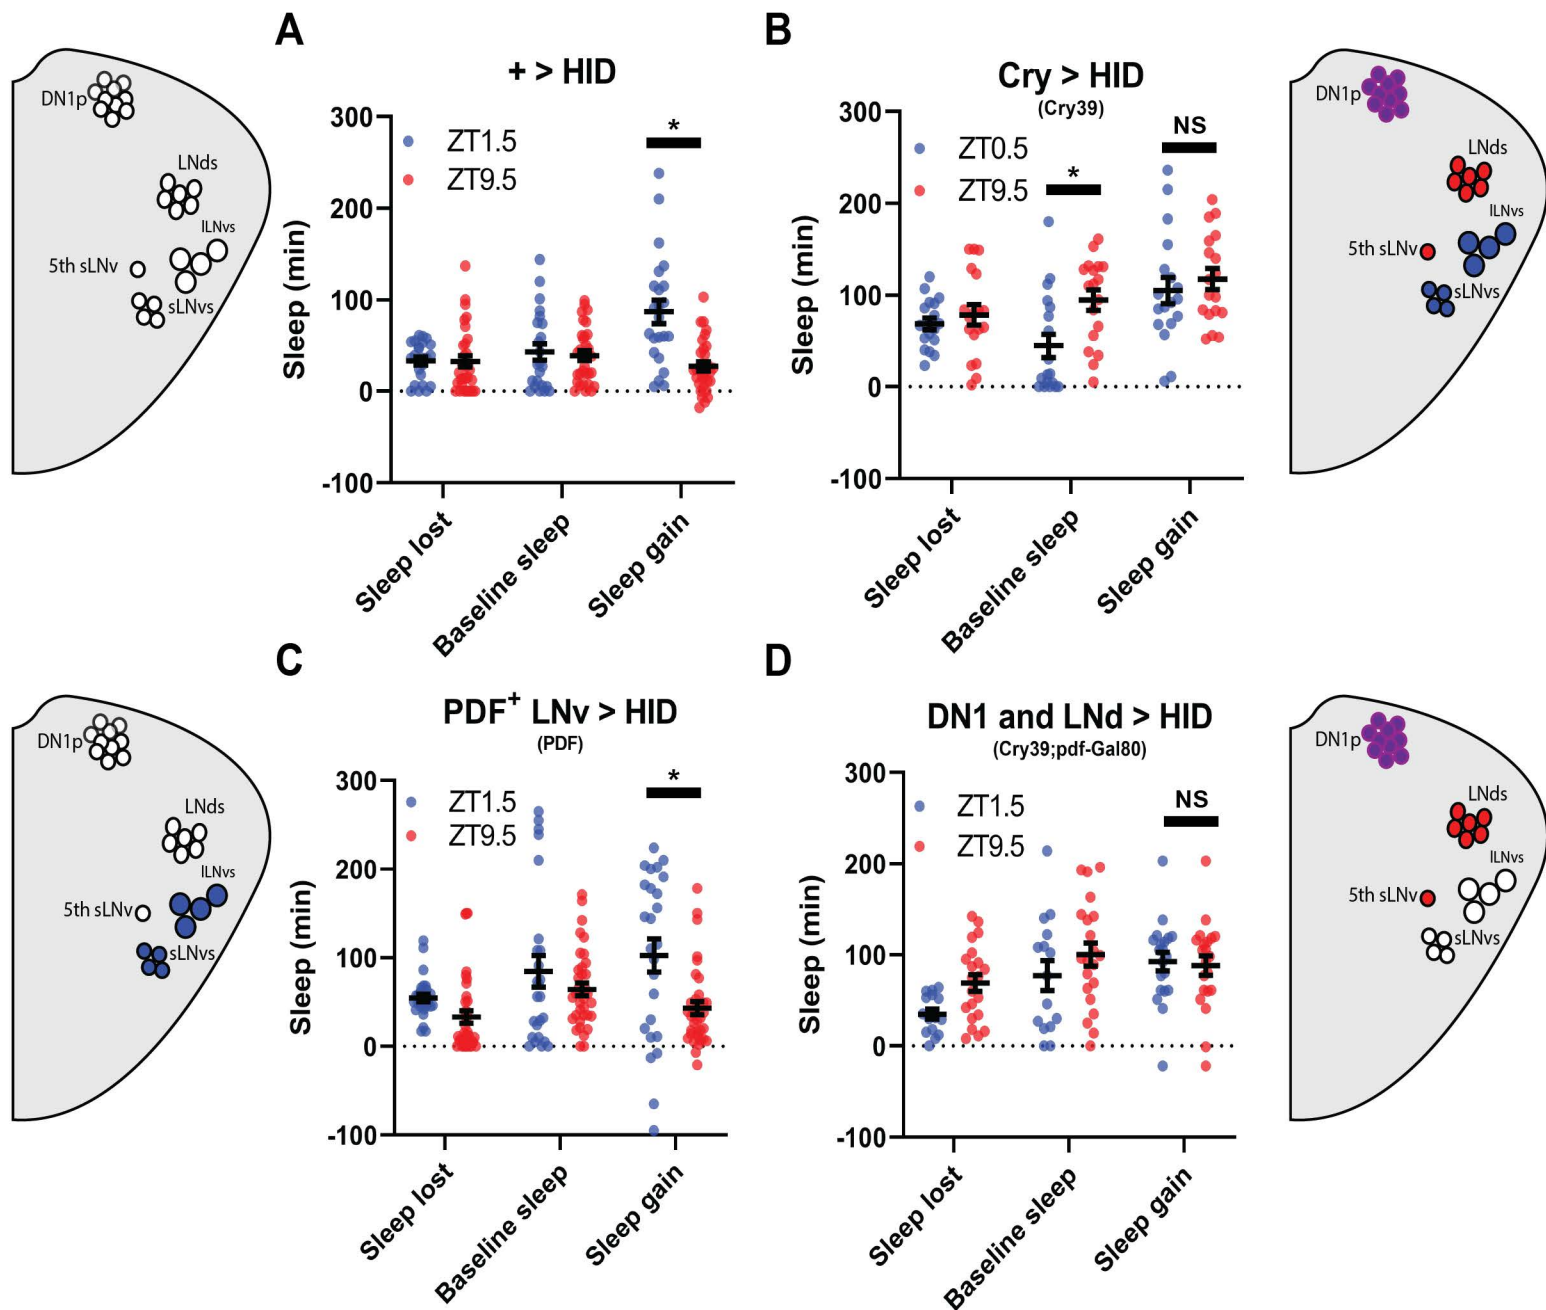

### Supplemental Figure 3: PDF<sup>+</sup> neurons do not mediate morning/evening differences in rebound

(A,B,C,D) Comparison of sleep lost, baseline sleep, and sleep gain following deprivation at morning and evening timepoints in clock neuron-ablated flies. Morning times are matched with evening time points with similar baselines. (A) Control flies with no ablated neurons (+ > hid) (N=27) exhibit greater rebound in the morning compared to matched evening time point ( $P < 0.0001$ , paired t-test). (B) Flies with most clock neurons ablated (*cry39* > hid) (N=19) exhibit no difference in sleep gain between matched morning/evening time points ( $P > 0.70$ , paired t-test). (C) Flies with PDF<sup>+</sup> neurons ablated (*pdf* > hid) (N=35) exhibit greater rebound in the morning compared to a matched evening time point ( $P < 0.01$ , paired t-test). (D) Flies with most clock neurons ablated except PDF<sup>+</sup> neurons (*cry39; pdf-Gal80* > hid) (N=22) exhibit no significant difference in sleep gain between matched morning/evening time points ( $P > 0.97$ , paired t-test).

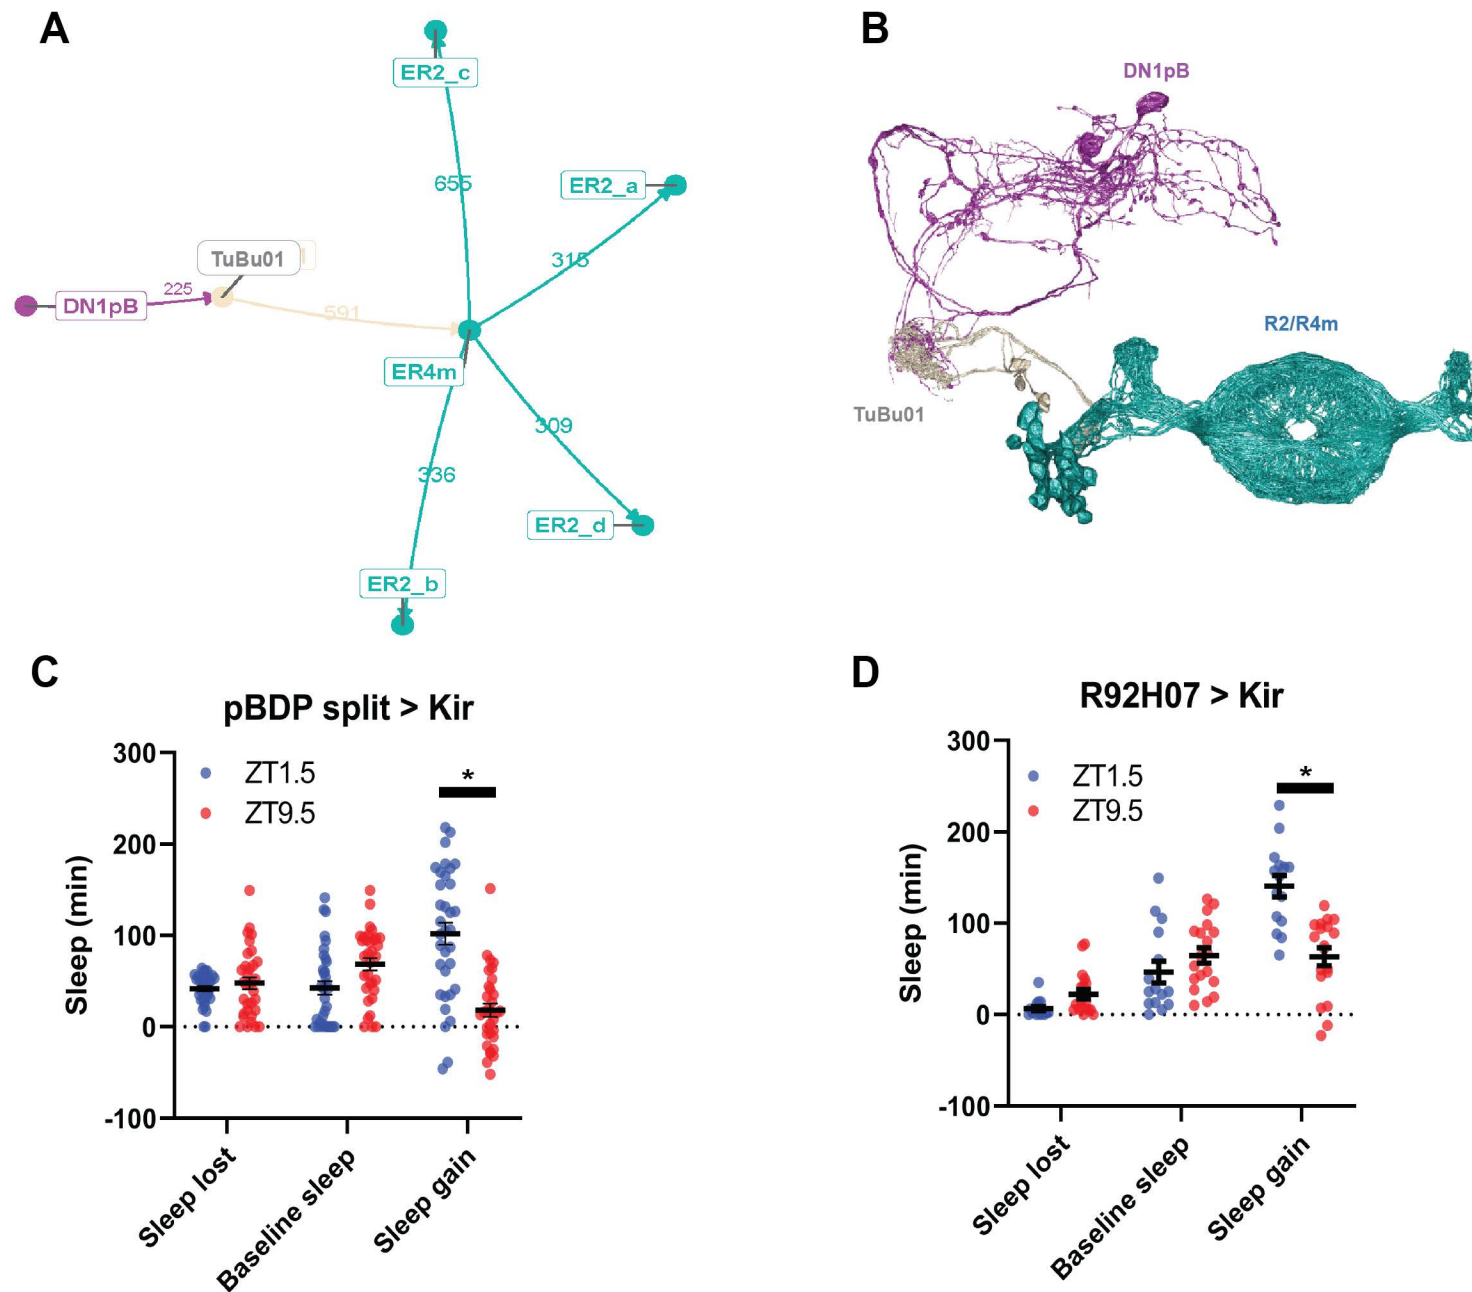

**Supplemental Figure 4: Connectome analysis demonstrates link between anterior projecting DN1ps and R2/R4m ellipsoid body ring neurons.**

(A) Node network diagram of pathway from anterior projecting DN1ps to R2/R4m via Tubu intermediates. Arrows indicate directionality of projections and numbers represent average synaptic connections between groups of neurons. (B) Dorsal view of neuronal morphology of pathway from anterior projecting DN1ps to R2/R4m via Tubu intermediates according to Neuprint EM reconstruction. Each cell subtype is color coded to match the model in A. (C-D) Comparison of sleep lost, baseline sleep, and sleep gain following deprivation at morning and evening time-points while modulating TuBu neurons. Morning times are matched with evening time points with similar baselines. (C) Enhancerless-Gal4 control flies (pBDP > Kir) (N=21) exhibit greater rebound in the morning compared to a matched evening time point ( $P < 0.01$ , paired t-test). (D) Flies with TuBu neurons silenced (R92H07 > Kir) (N=21) exhibit greater rebound in the morning compared to a matched evening time point ( $P < 0.0001$ , paired t-test).



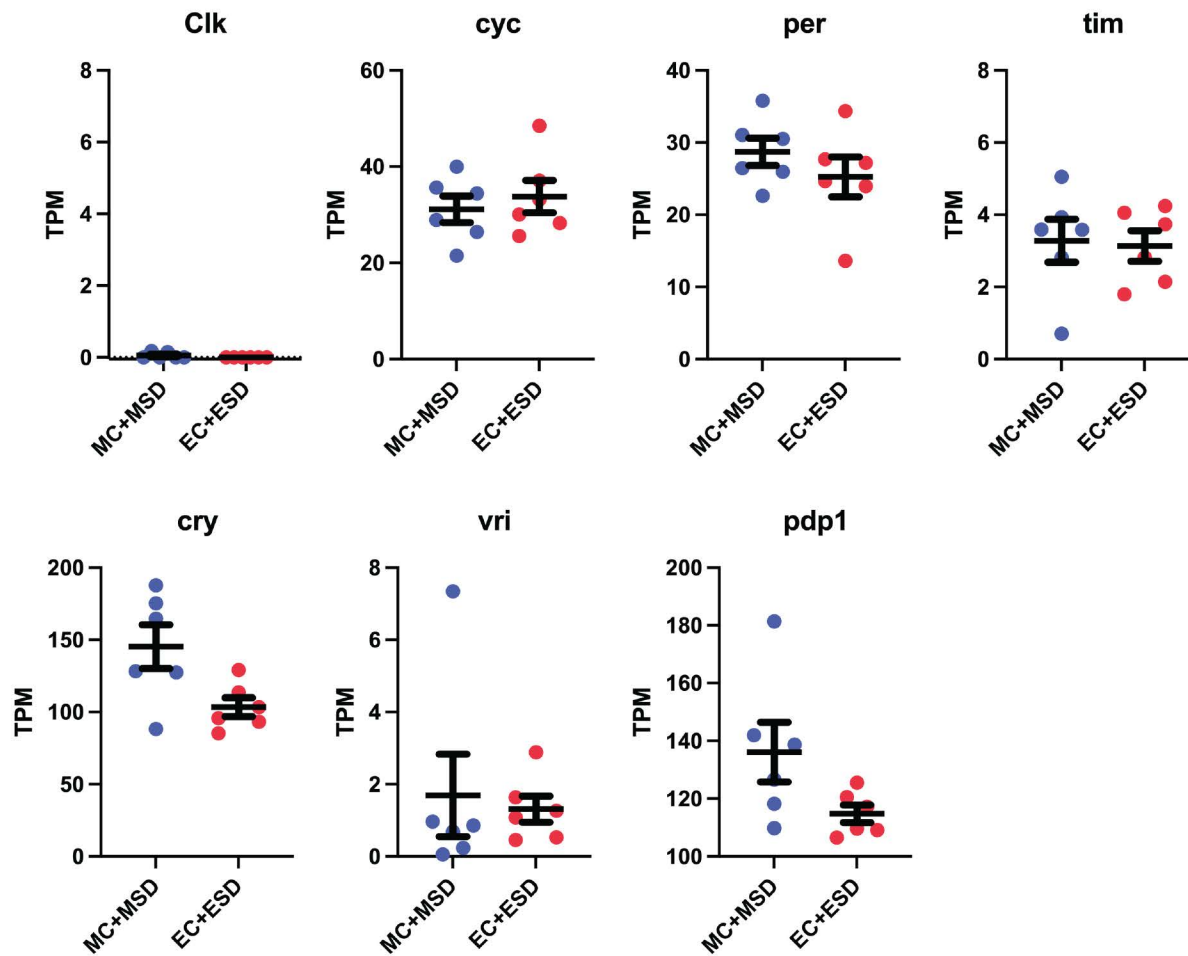

**Supplemental Figure 5: Clock genes are not oscillating in R5 neurons**

Scatter plots for core clock genes. Transcripts Per Kilobase Million (TPM) is shown for each sample. All morning samples are grouped and all evening samples are grouped.

| Genotype                               | Region/Cells targeted    | LD morning anticipation | LD evening anticipation | N  |
|----------------------------------------|--------------------------|-------------------------|-------------------------|----|
| <b>+&gt; hid</b>                       | clock Gal4 control (HID) | 0.14 +/- 0.04           | 0.37 +/- 0.03           | 17 |
| <b>pBDP split &gt; hid</b>             | Split control (HID)      | 0.13 +/- 0.02           | 0.24 +/- 0.03           | 26 |
| <b>pBDP split &gt; kir</b>             | Split control (Kir)      | 0.10 +/- 0.02           | 0.33 +/- 0.04           | 12 |
| <b>cry39 &gt; hid</b>                  | broad clock              | 0.05 +/- 0.02 **        | 0.12 +/- 0.04 ***       | 30 |
| <b>pdf &gt; hid</b>                    | PDF                      | -0.07 +/- 0.02 ***      | 0.24 +/- 0.03*          | 38 |
| <b>cry39; pdf-gal80 &gt; hid</b>       | LNd and Dn1              | 0.05 +/- 0.01 *         | 0.06 +/- 0.04 ***       | 14 |
| <b>R51H05 AD ; R18H11 DBD &gt; hid</b> | Glu+ DN1p                | 0.06 +/- 0.02 *         | 0.25 +/- 0.02           | 22 |
| <b>MB122 &gt; hid</b>                  | 3-4 LNds PDF-sLNv        | 0.12 +/- 0.02           | 0.25 +/- 0.02           | 35 |
| <b>MB122 &gt; kir</b>                  | 3-4 LNds PDF-sLNv        | 0.07 +/- 0.02           | 0.22 +/- 0.02           | 26 |

### Supplemental Table 1: Summary of male morning and evening anticipation

Data are means +/- SEM (\*p<0.05, \*\*p<0.01, \*\*\*:p<0.001).
